# Supplementary material
Source: PubMed Central journal article supplement (PMC6451642)

# Extended Data Figure 10

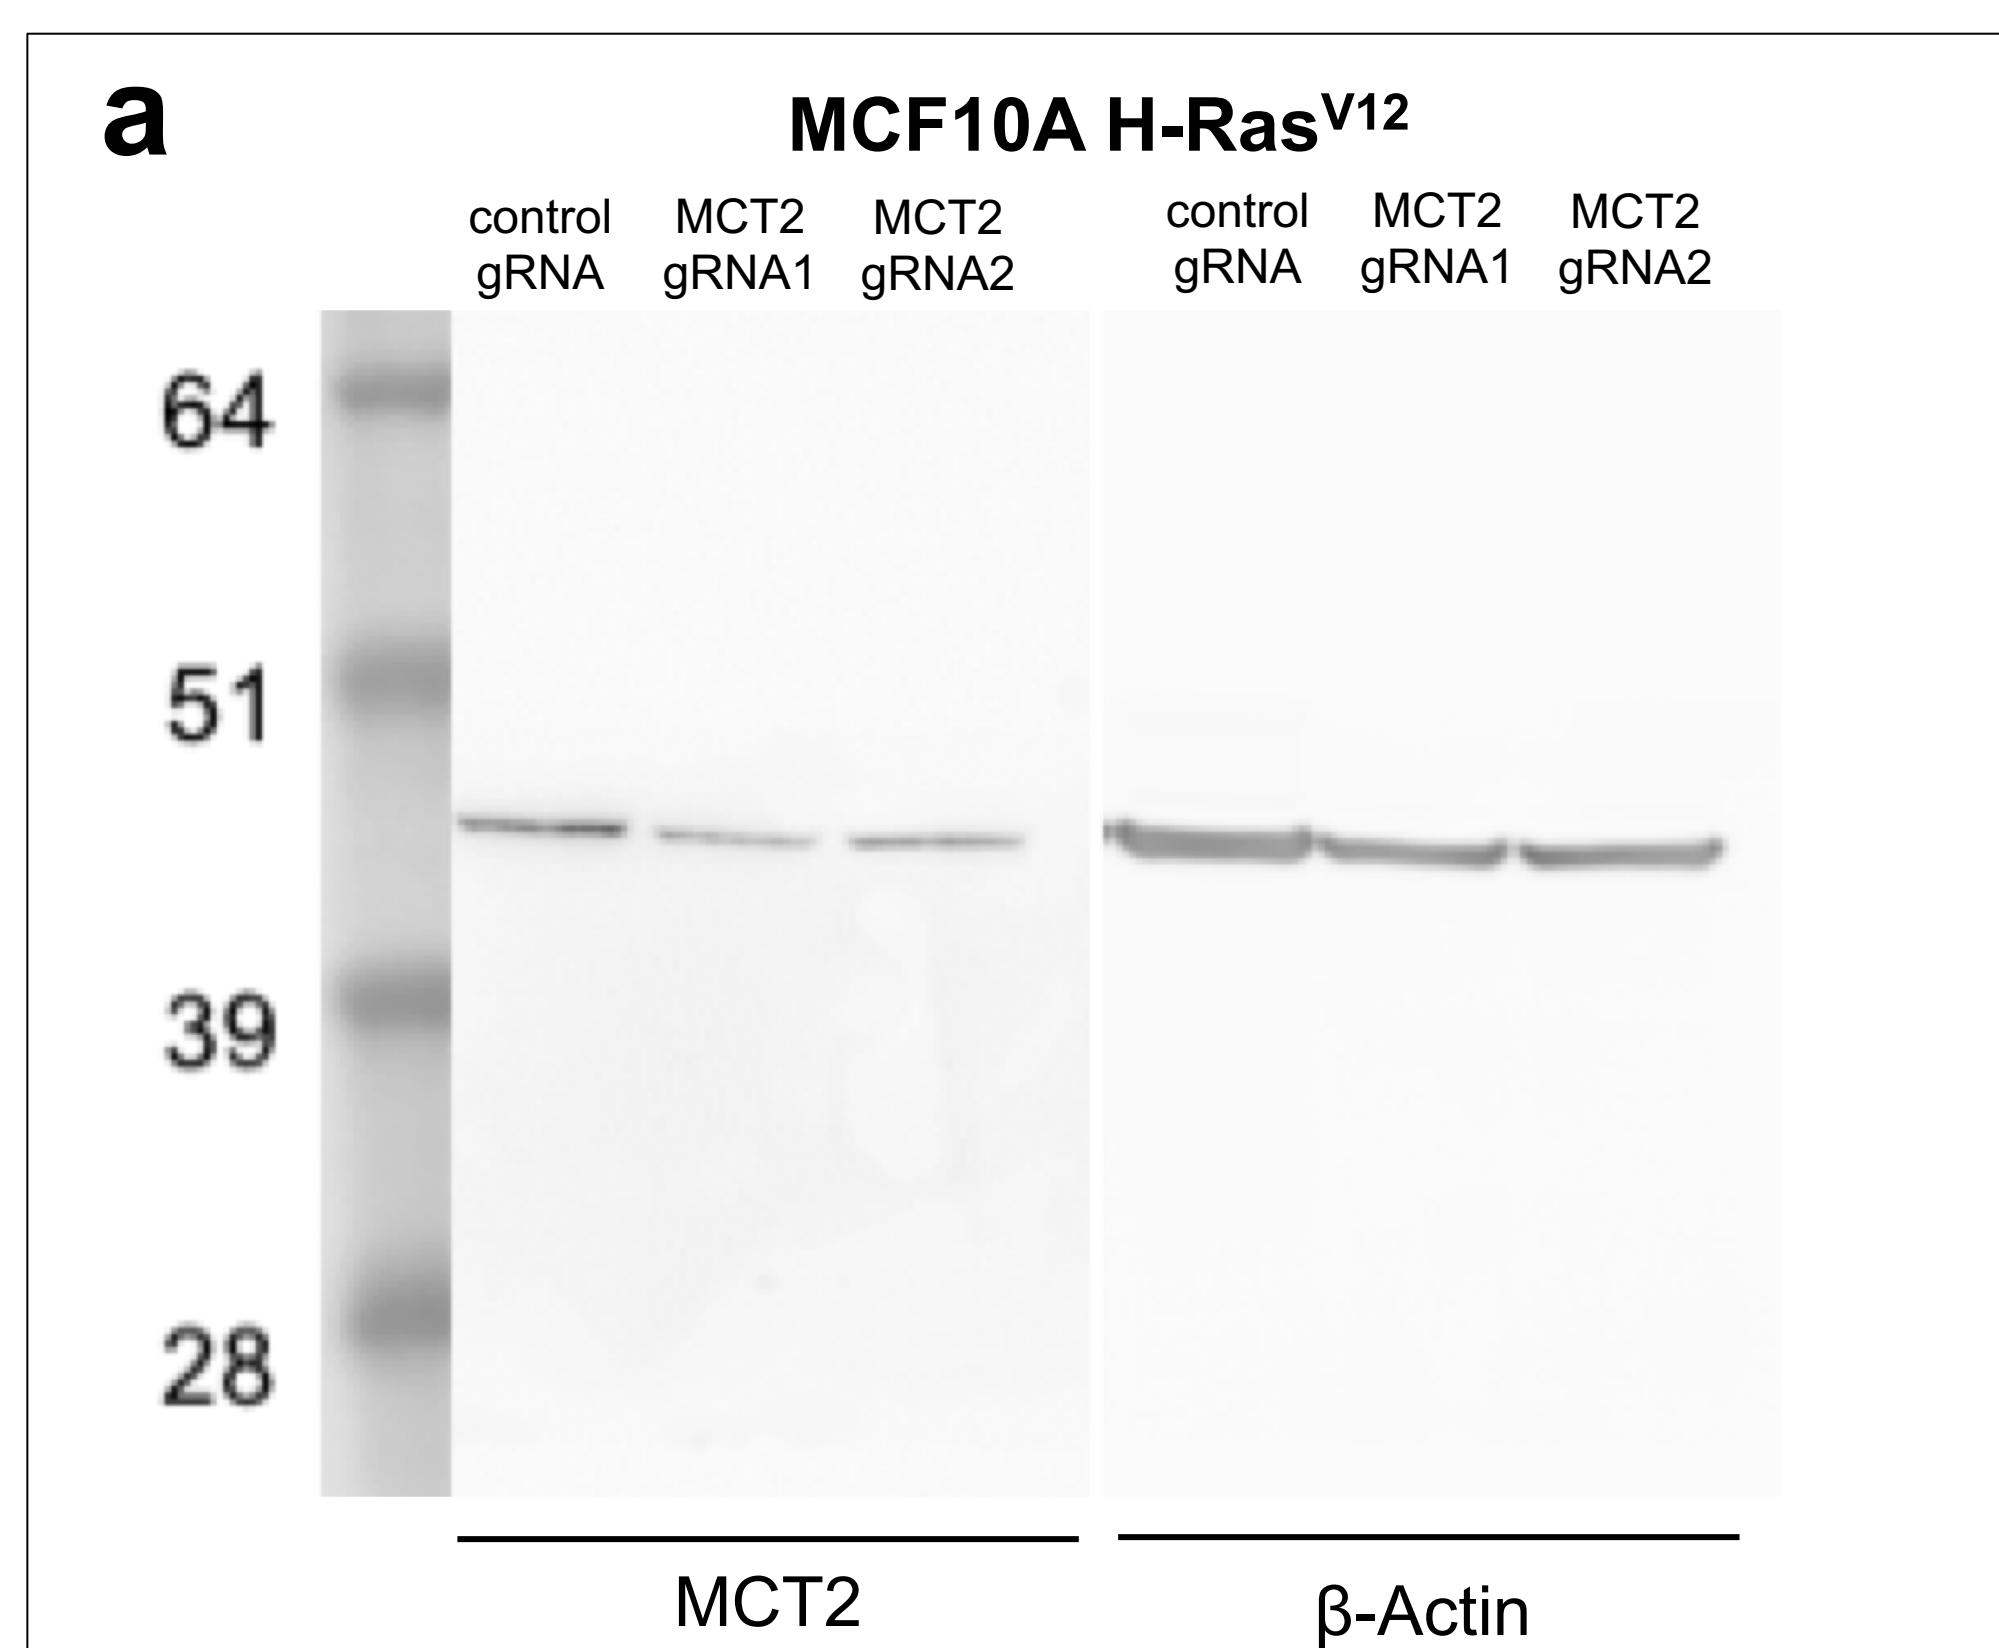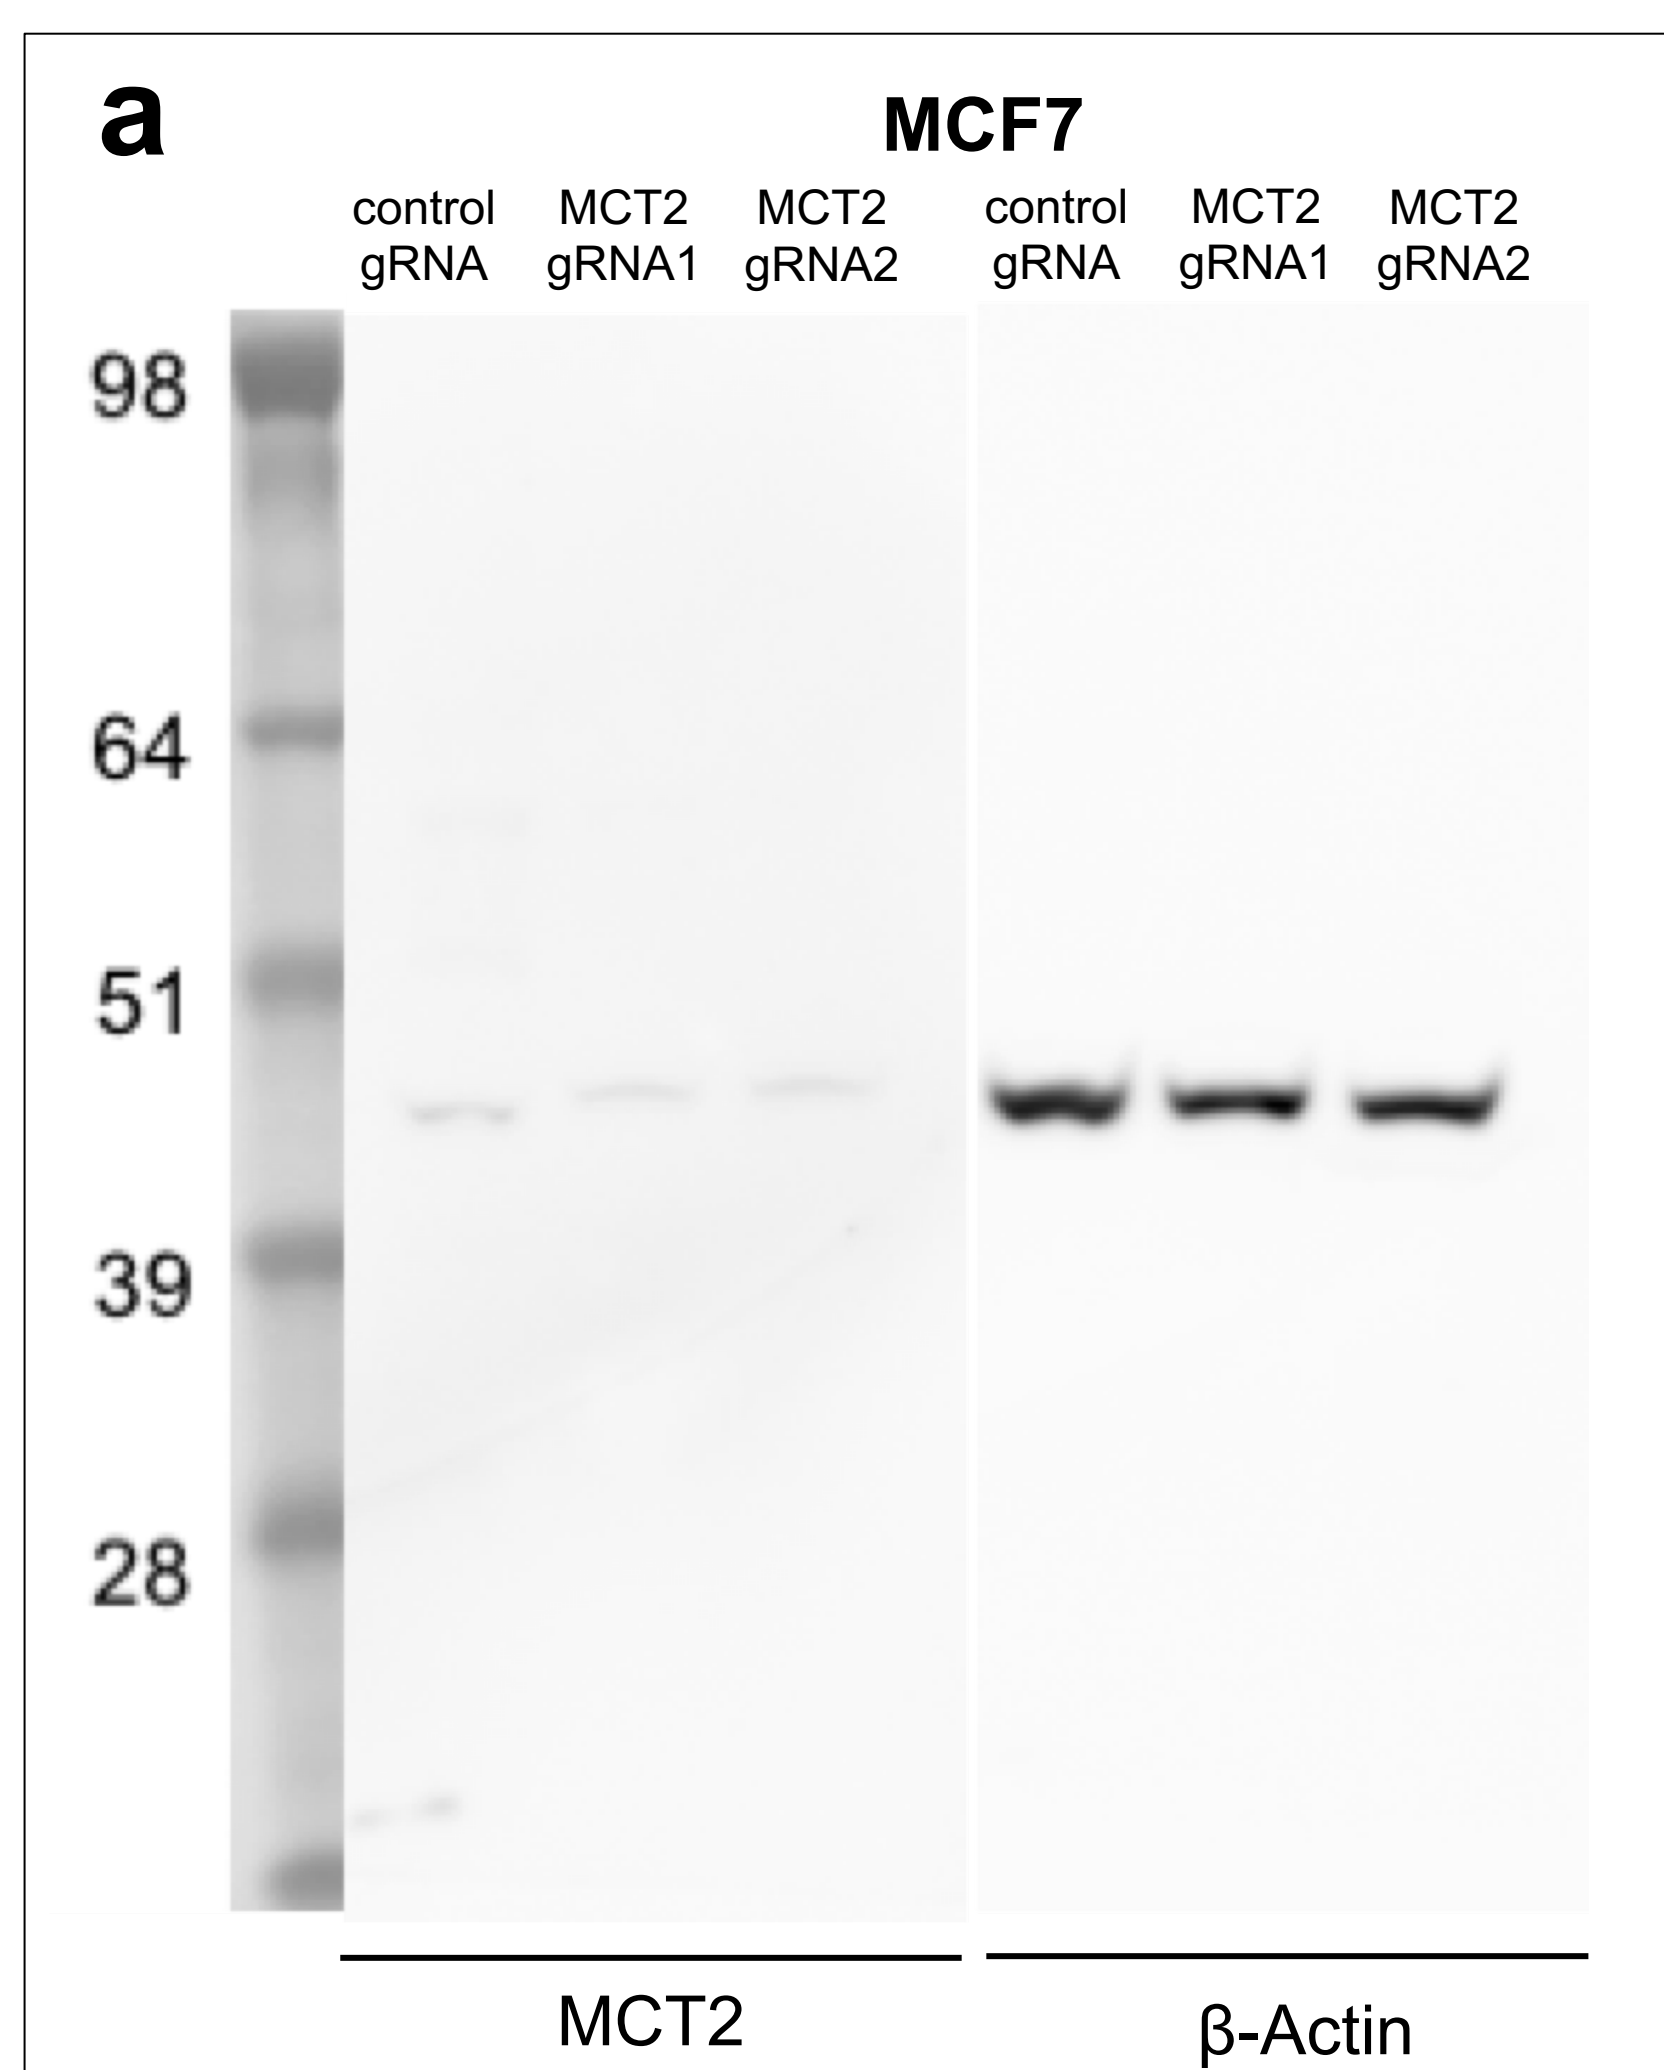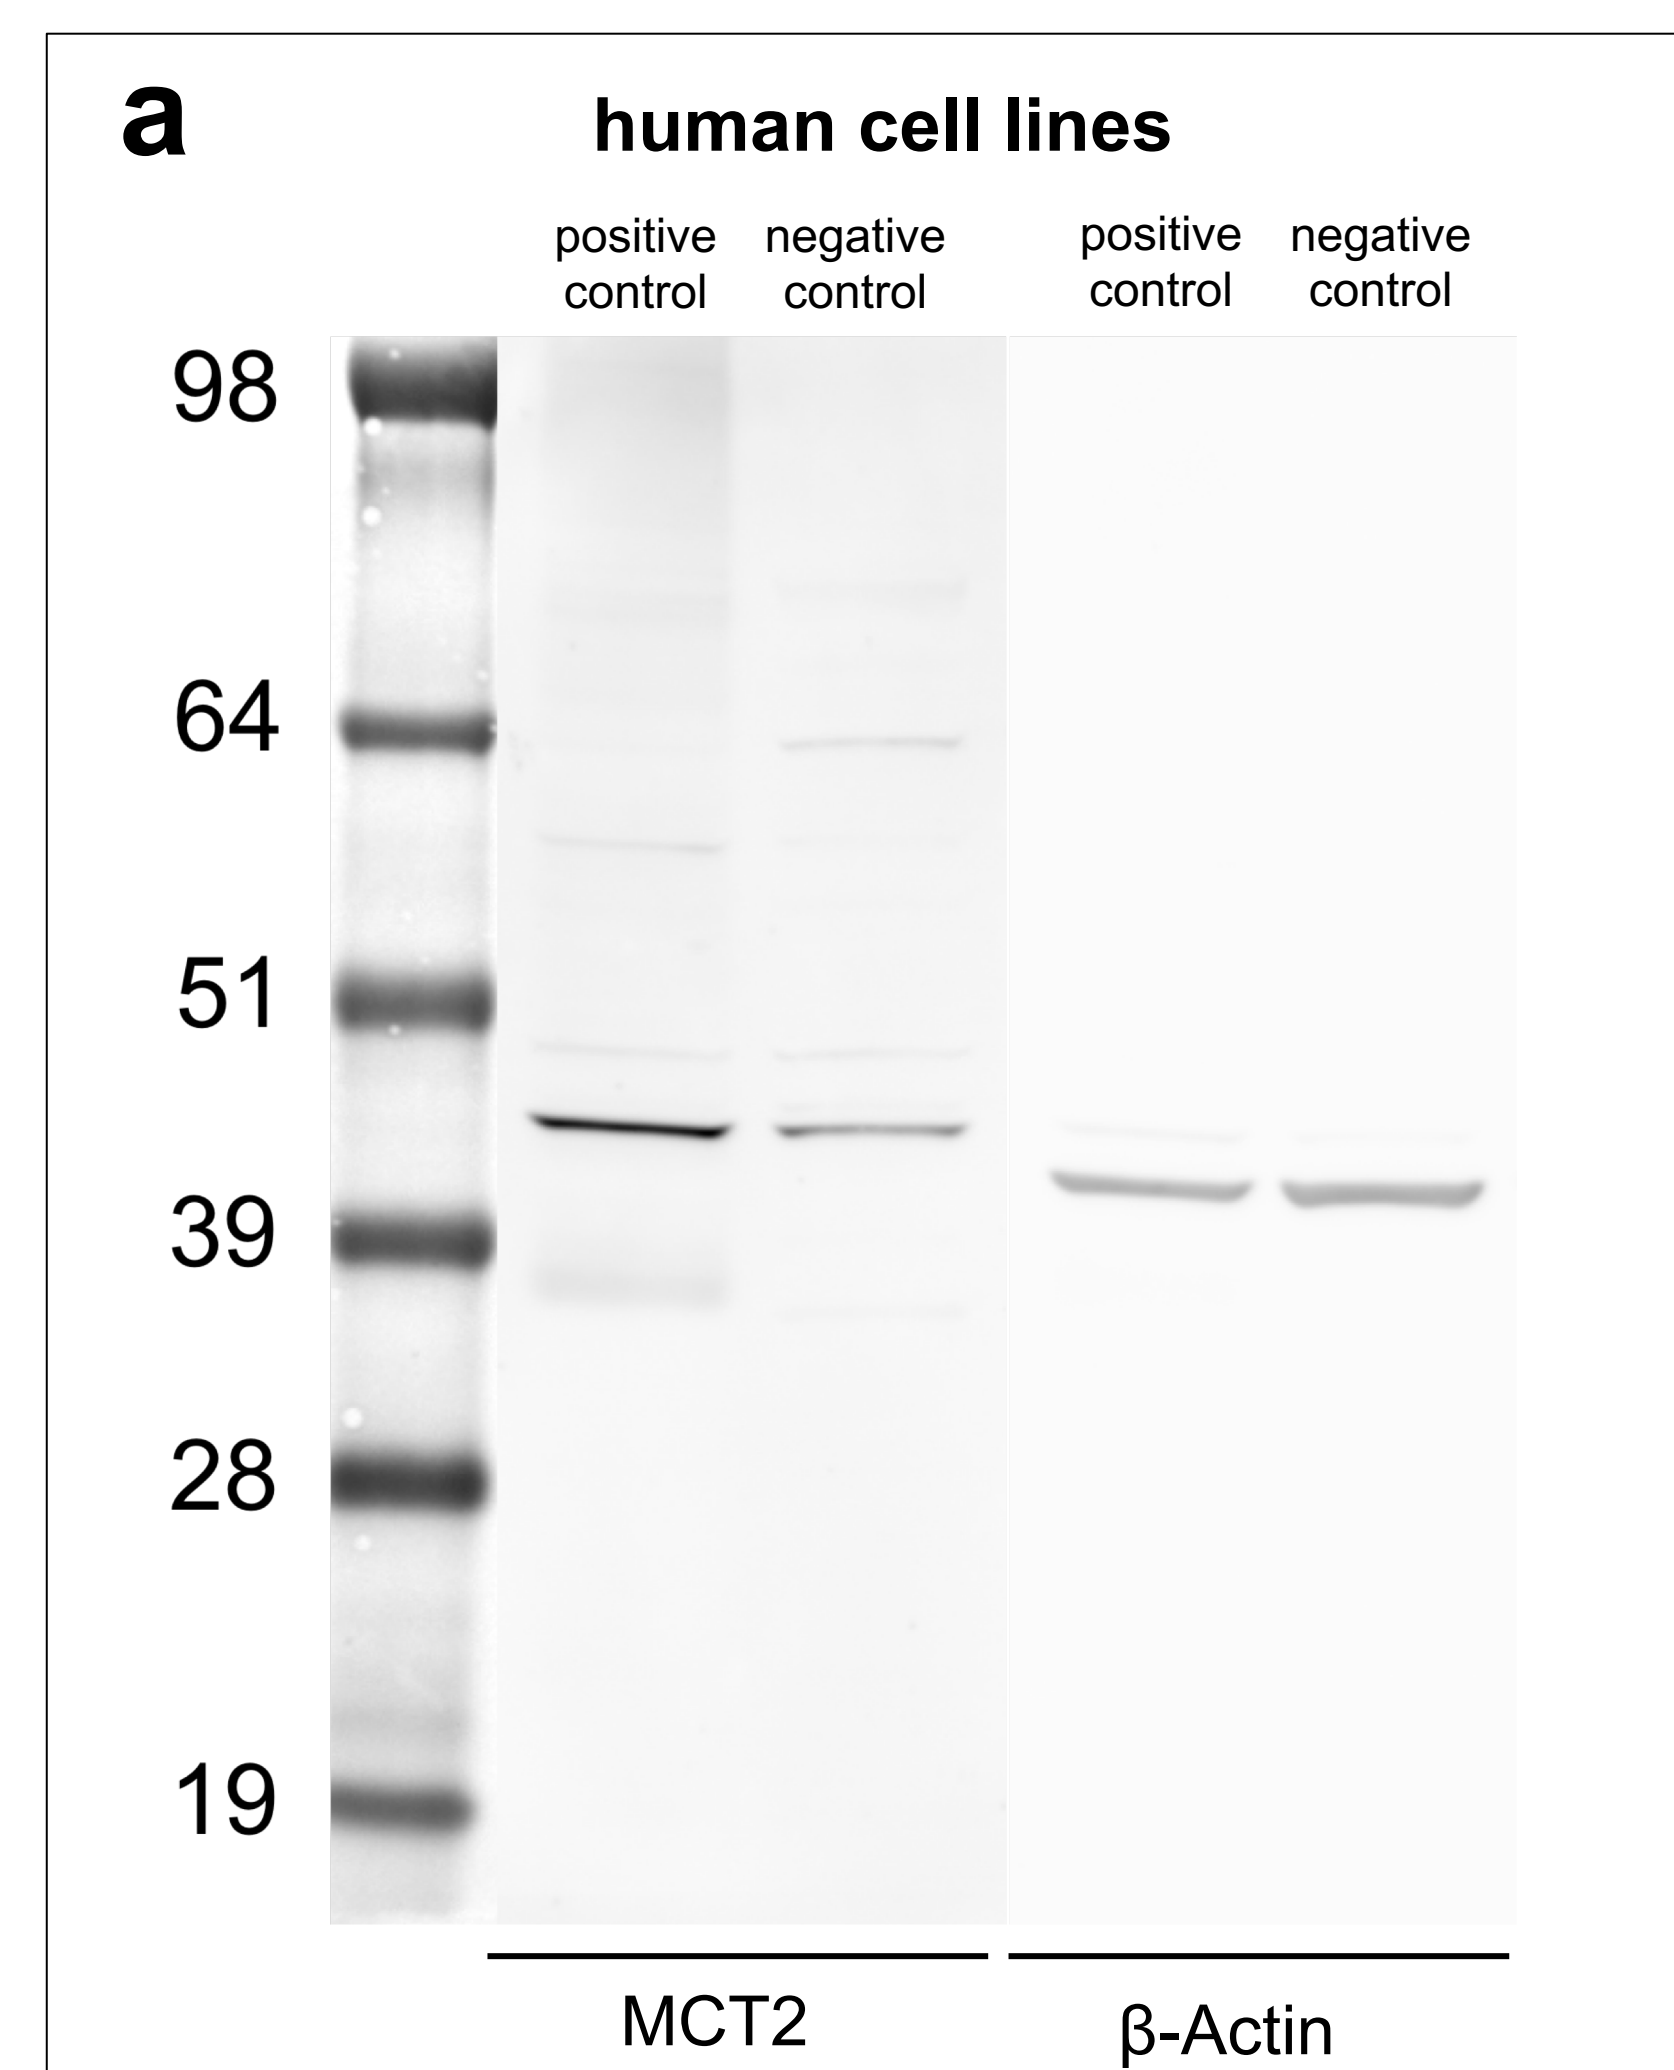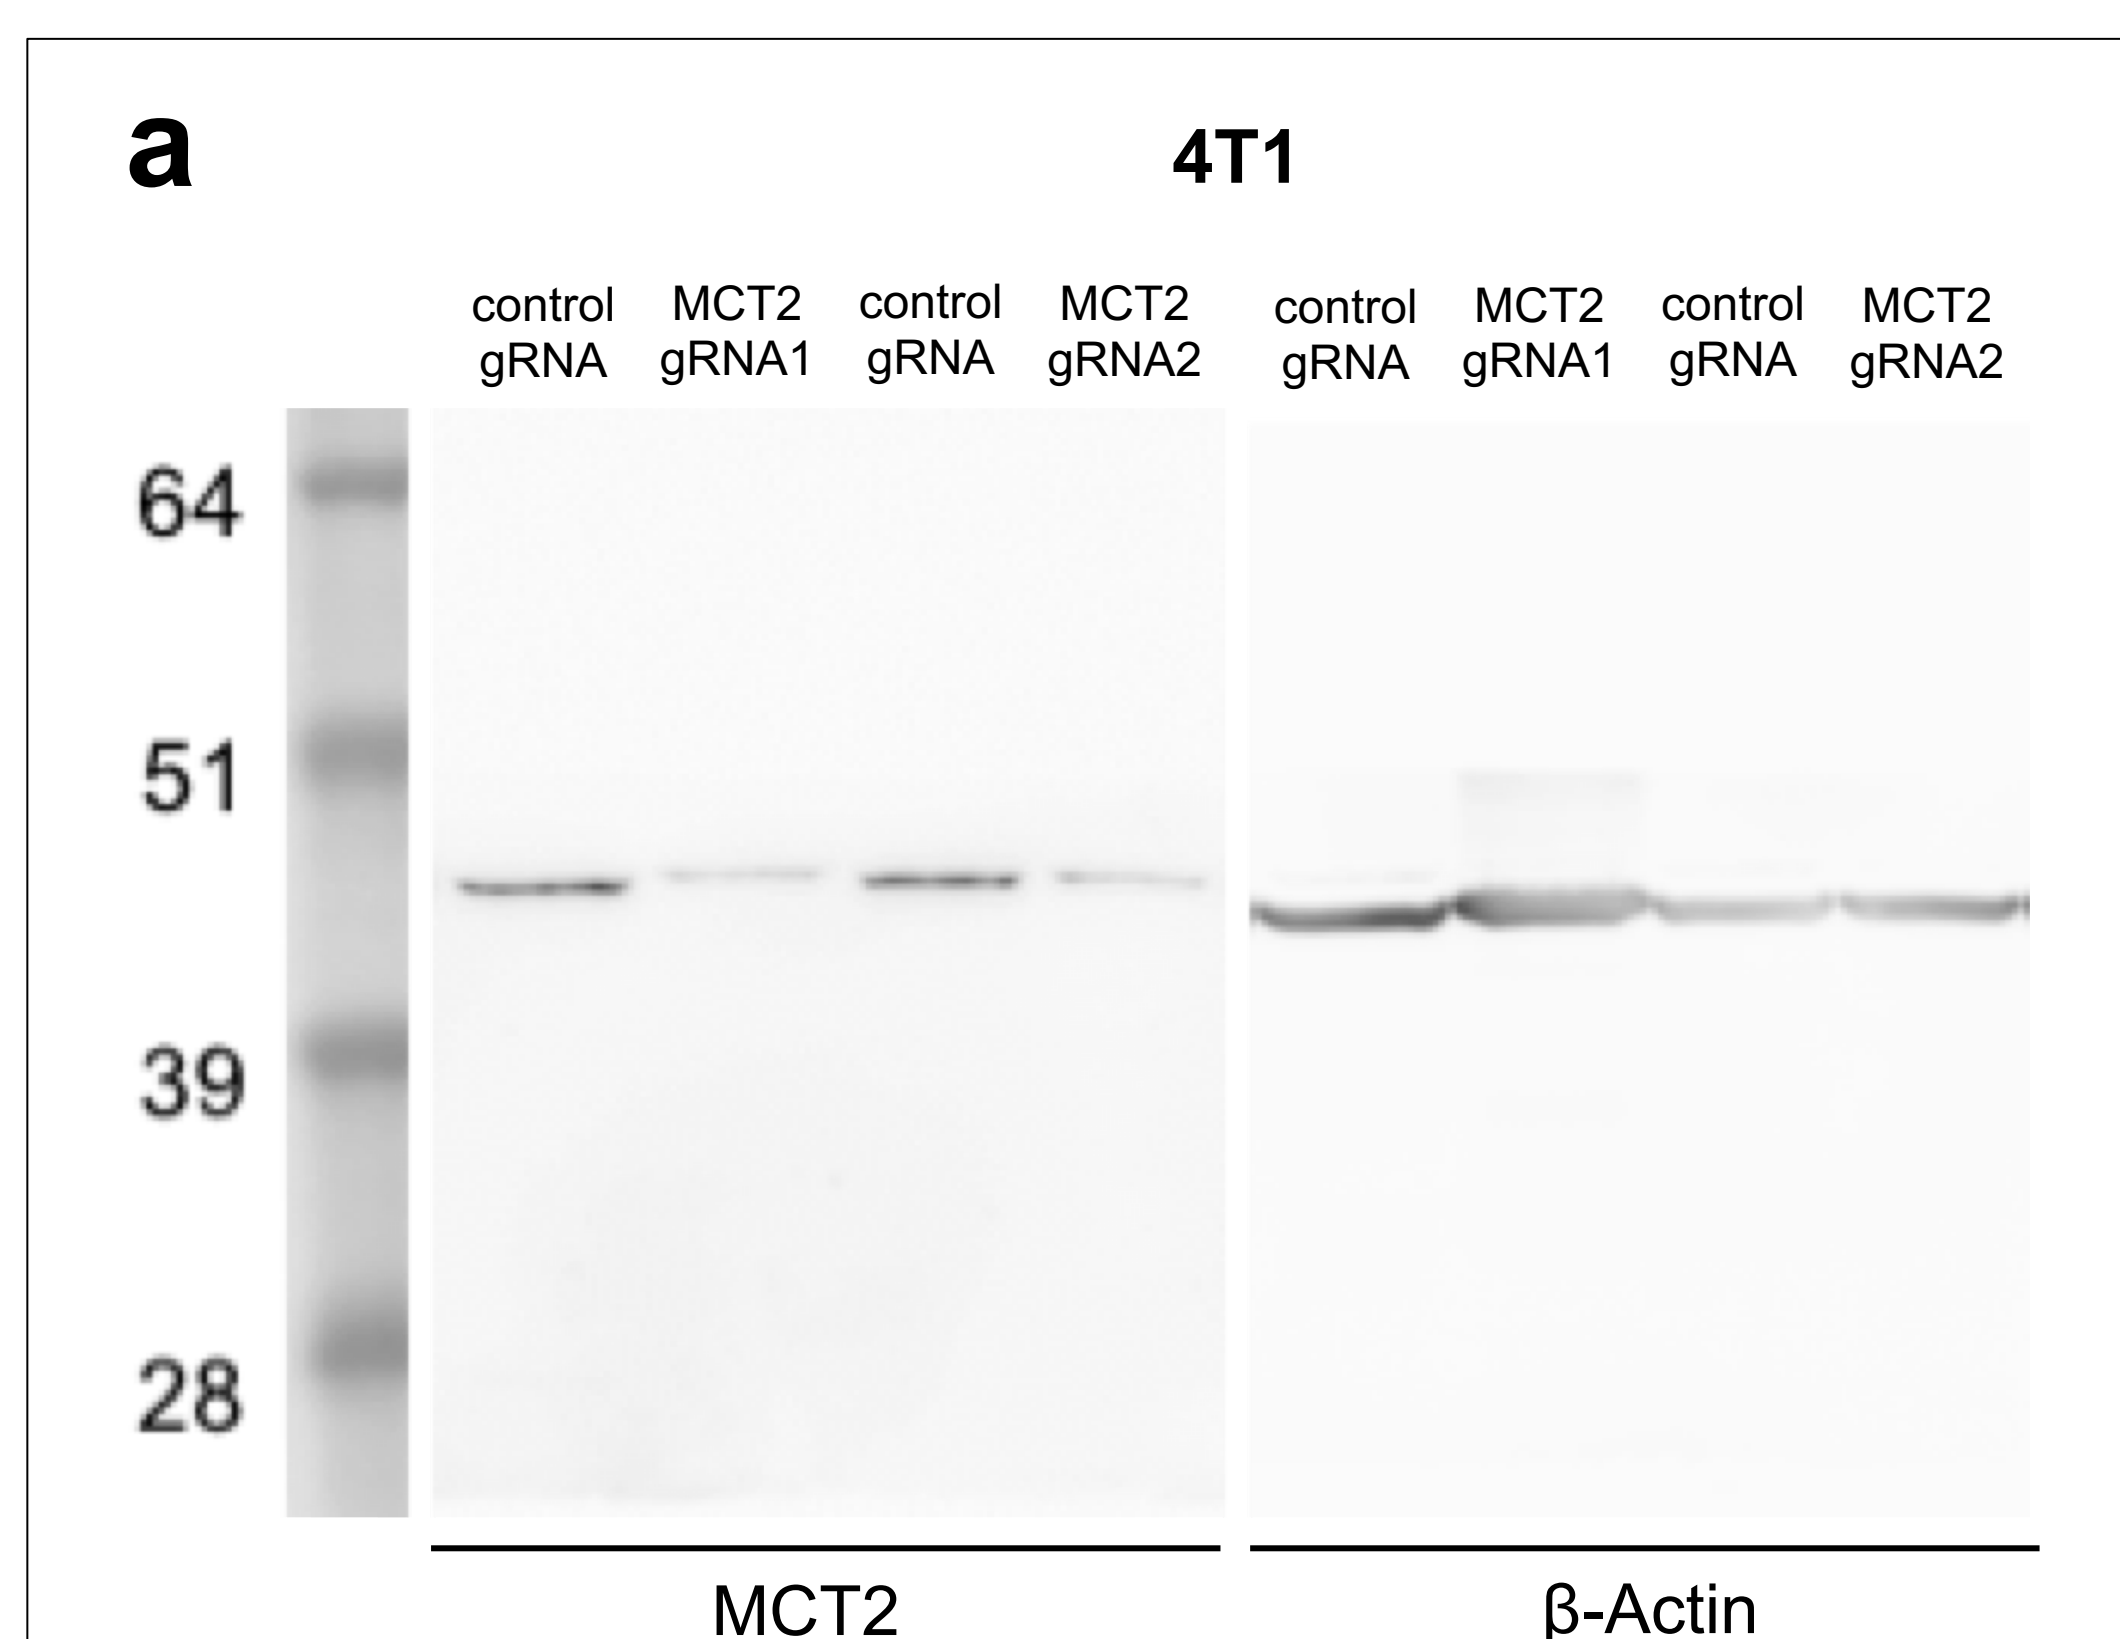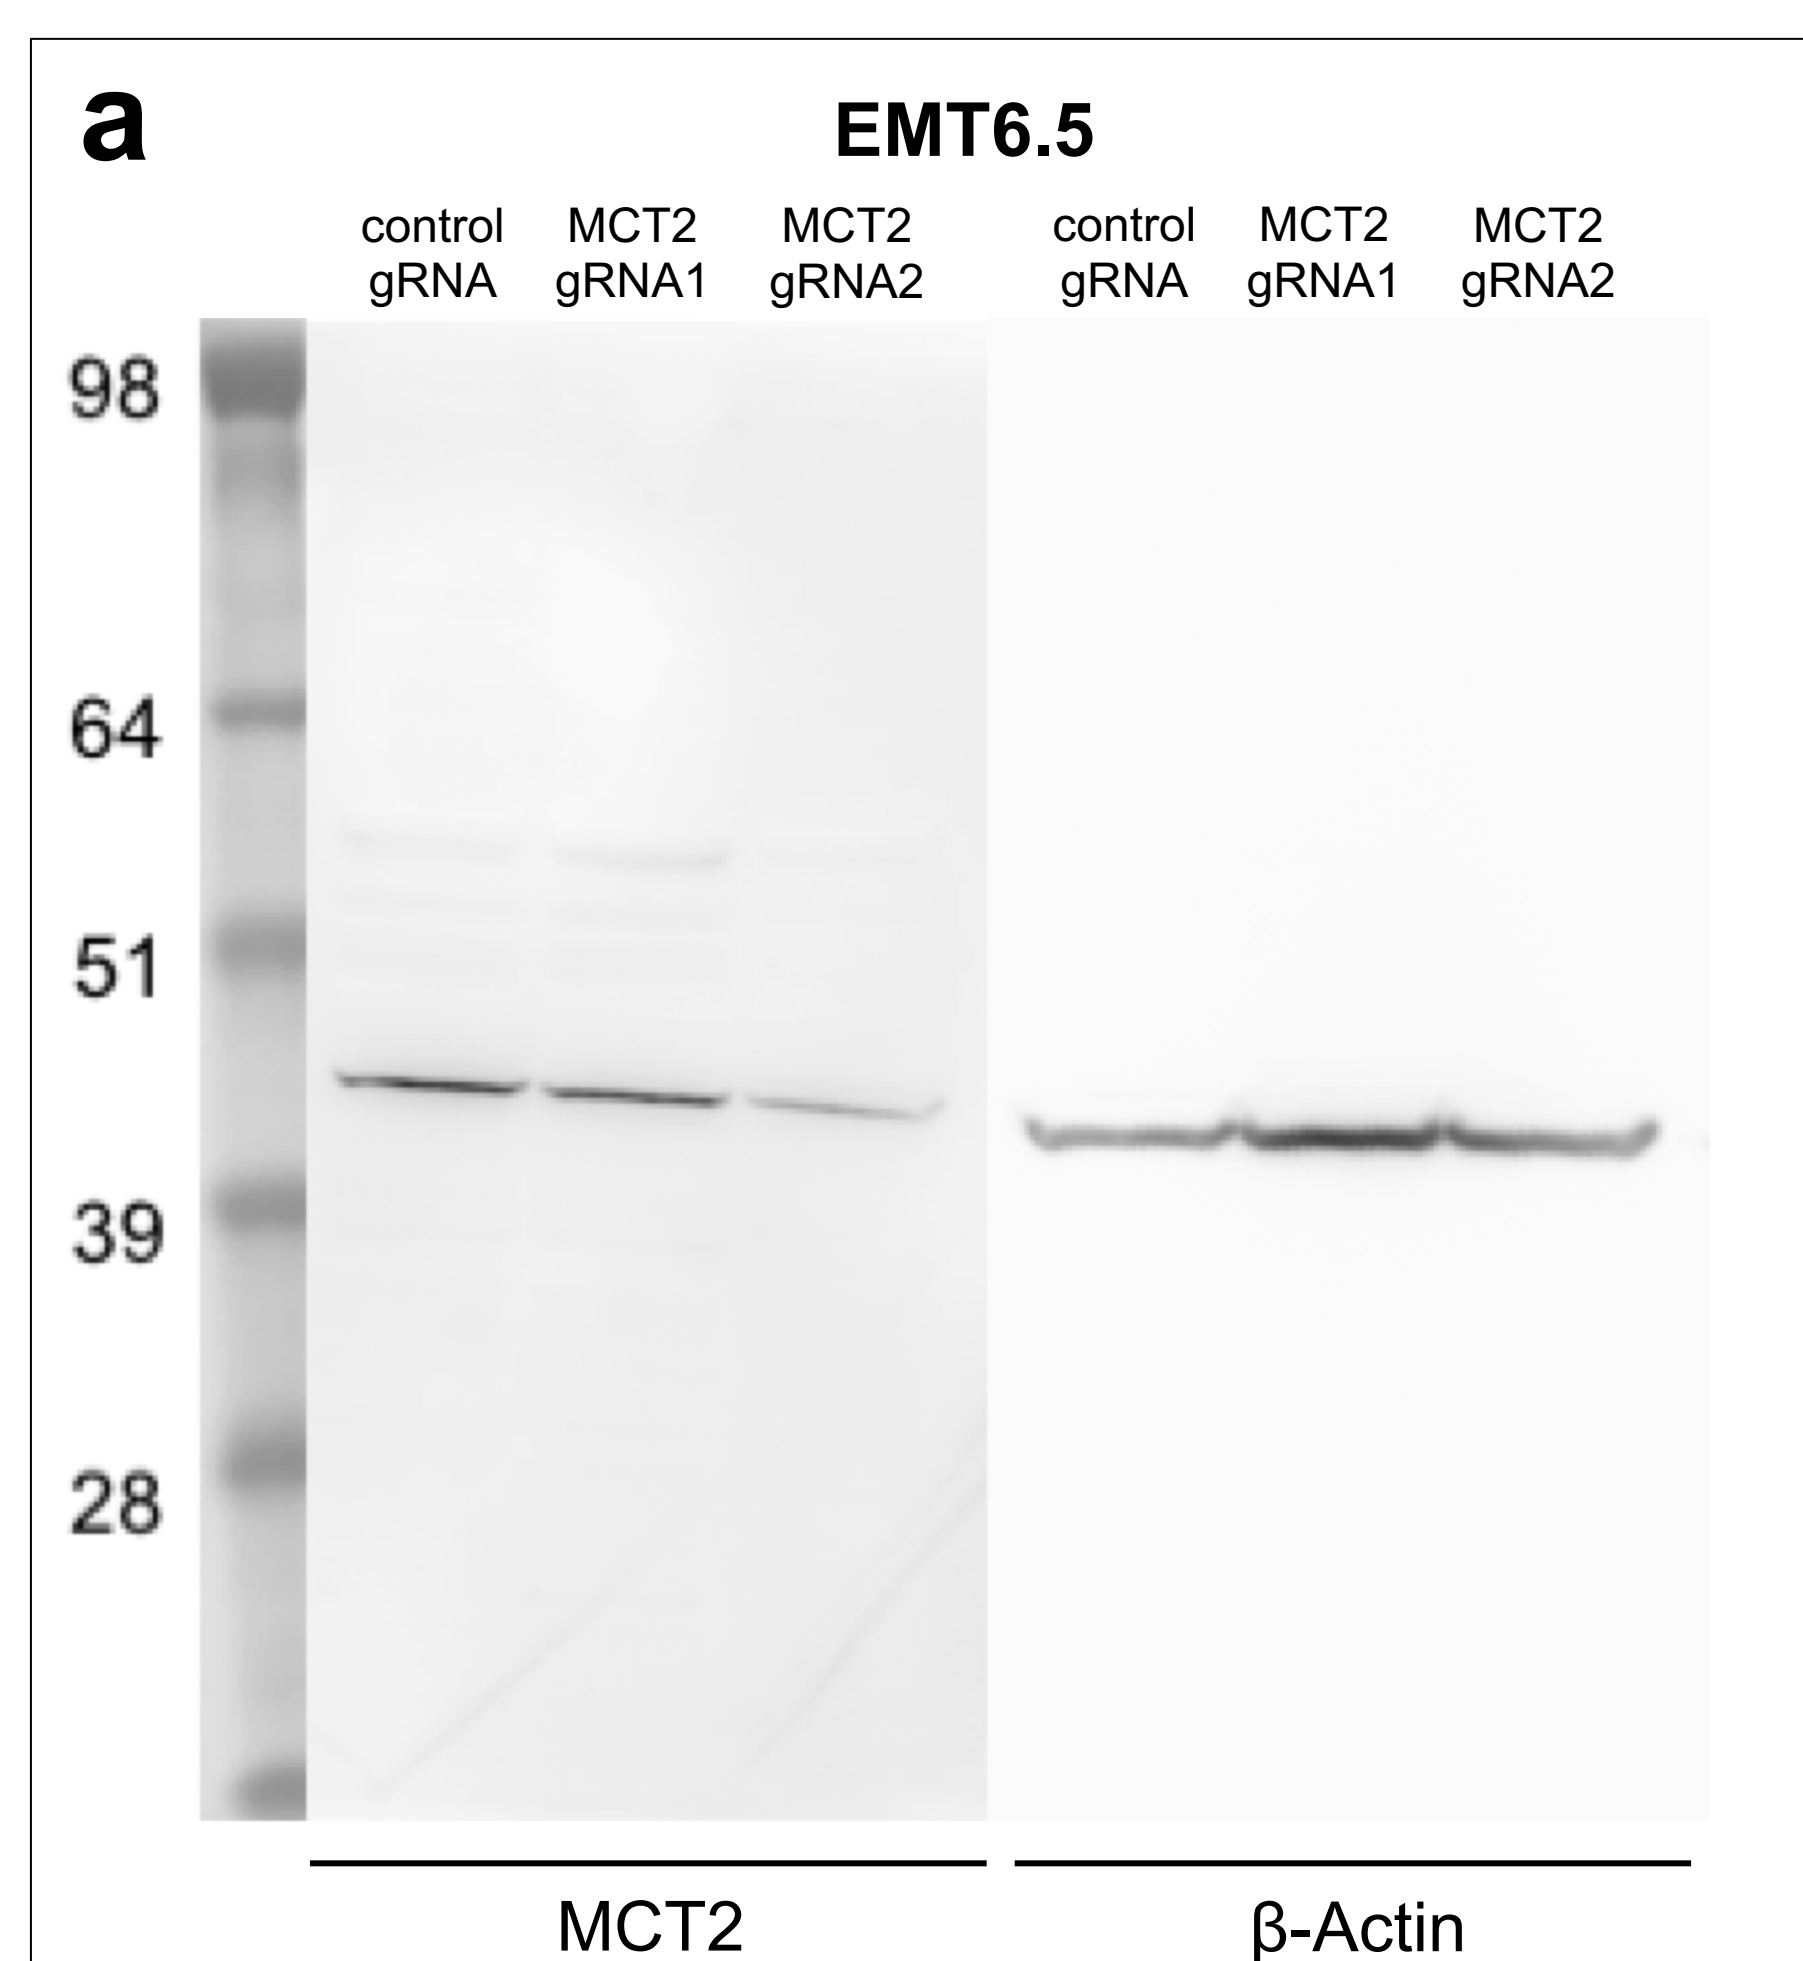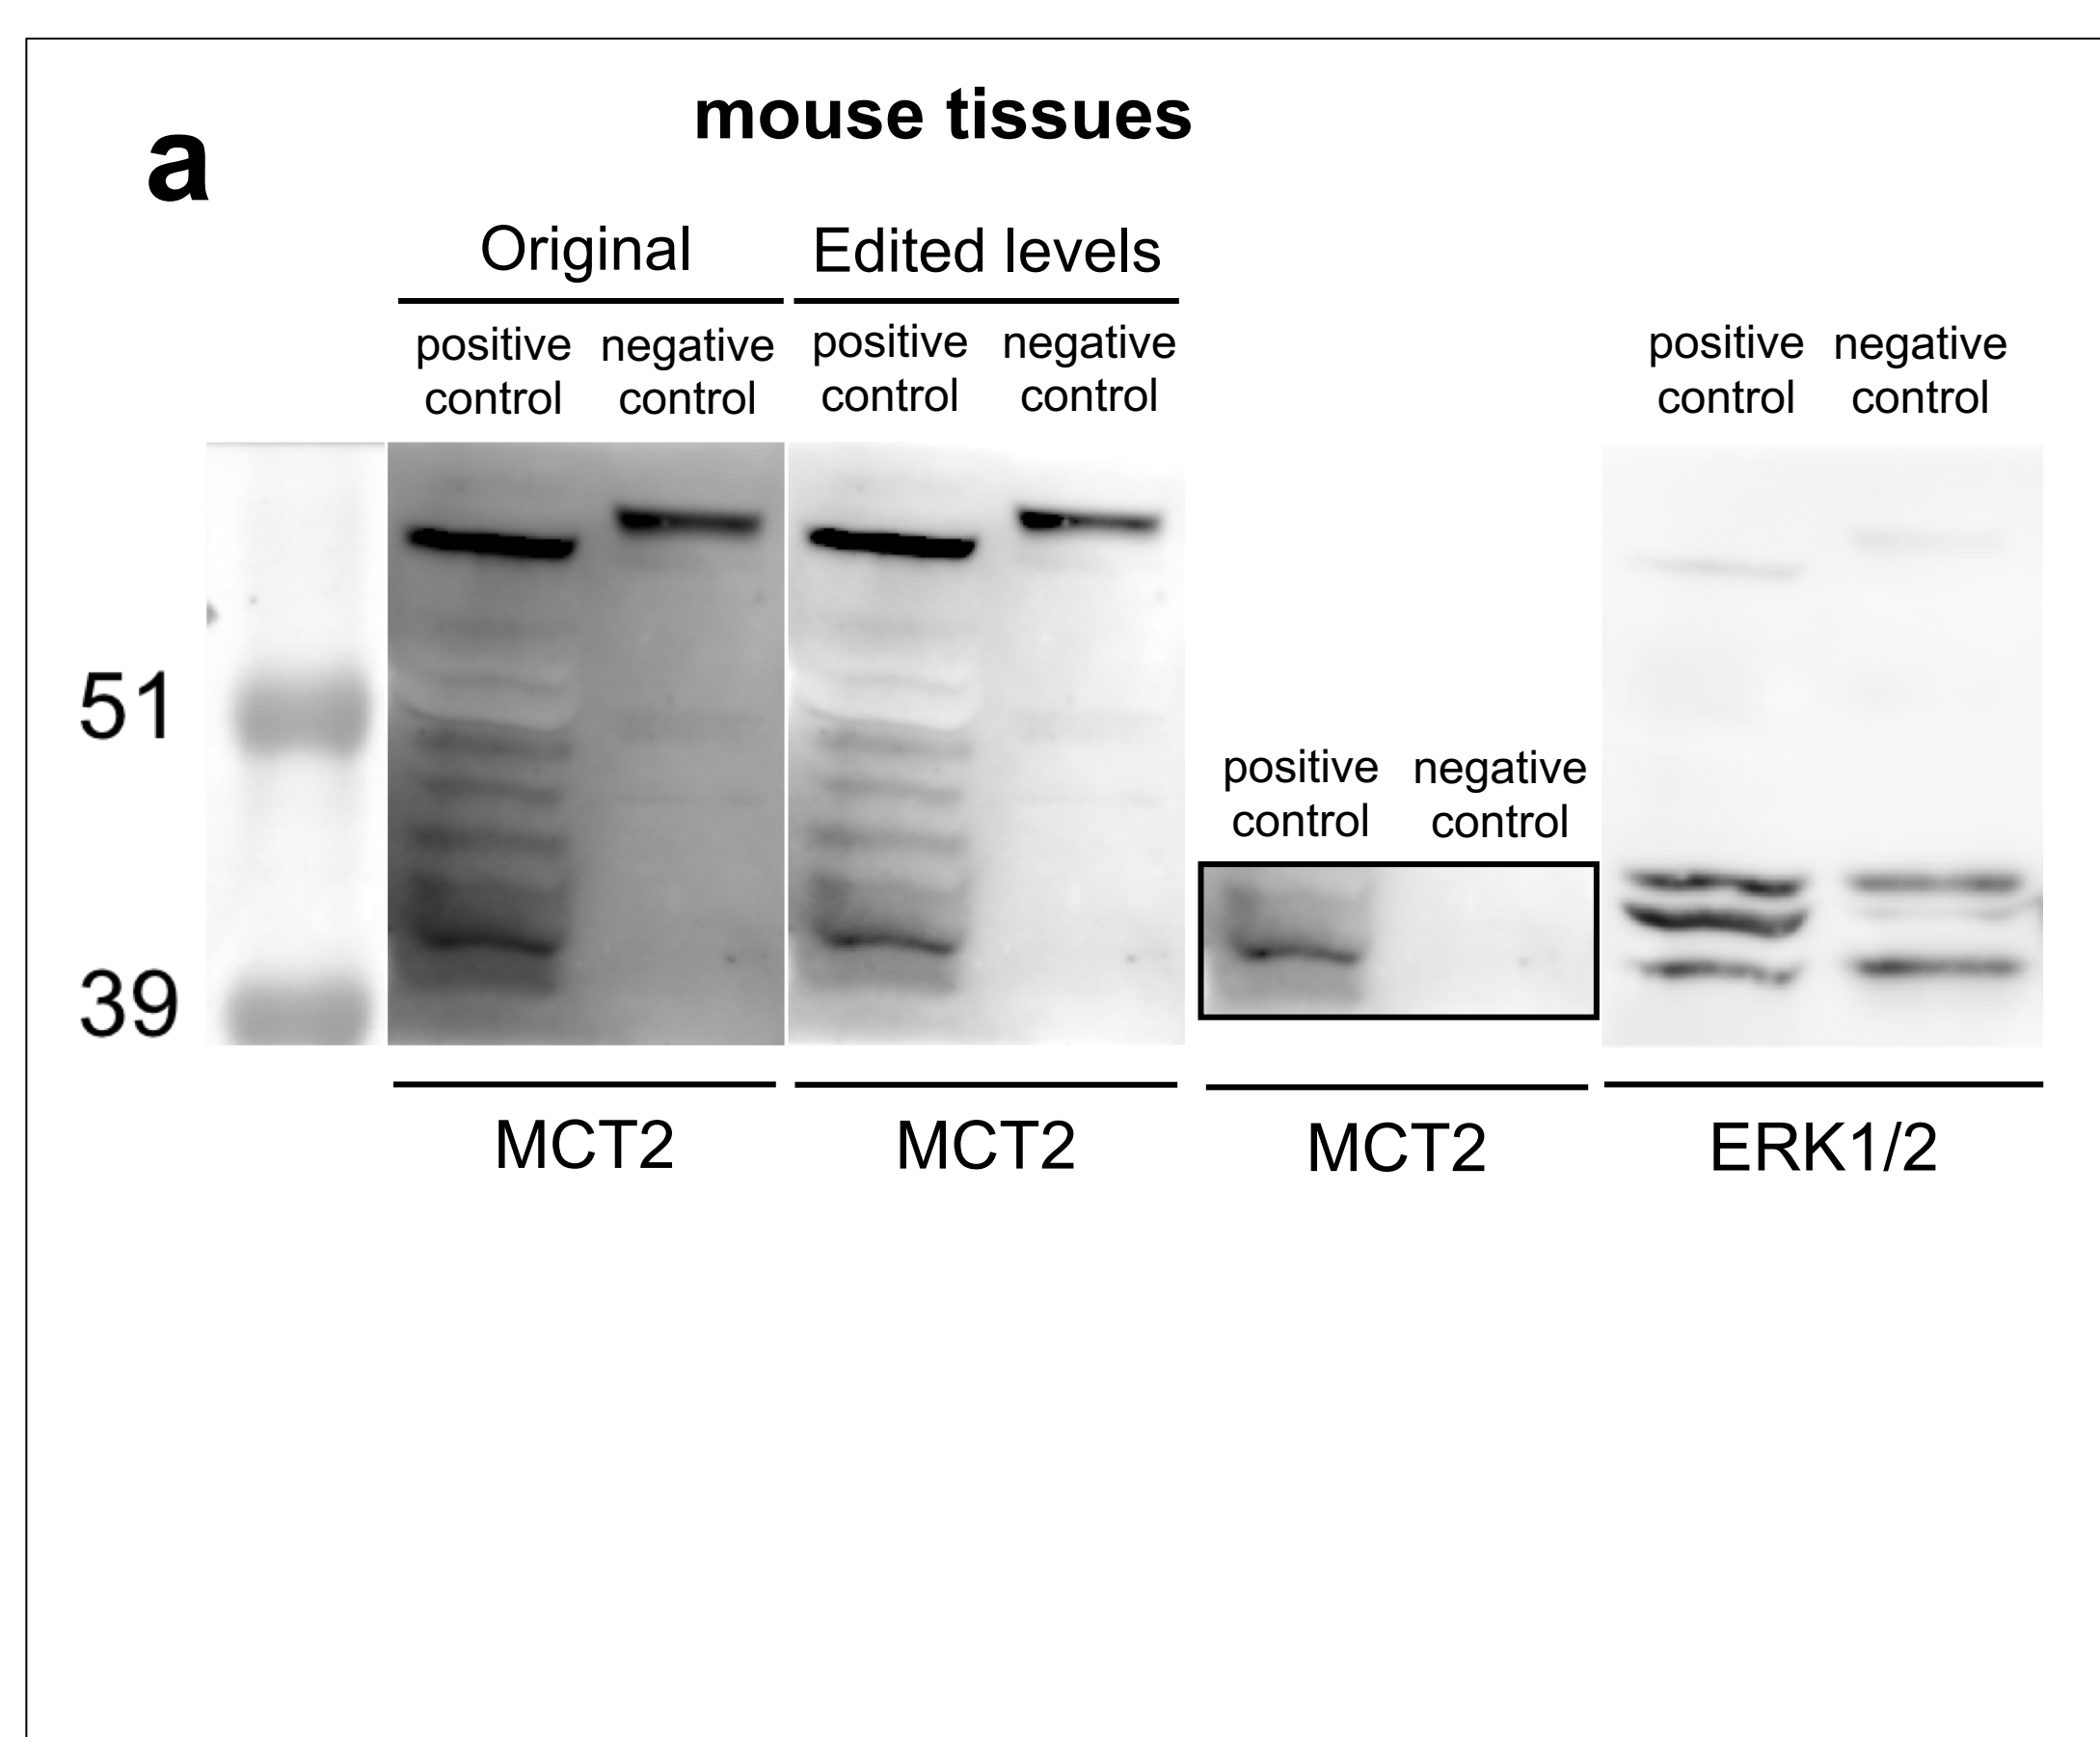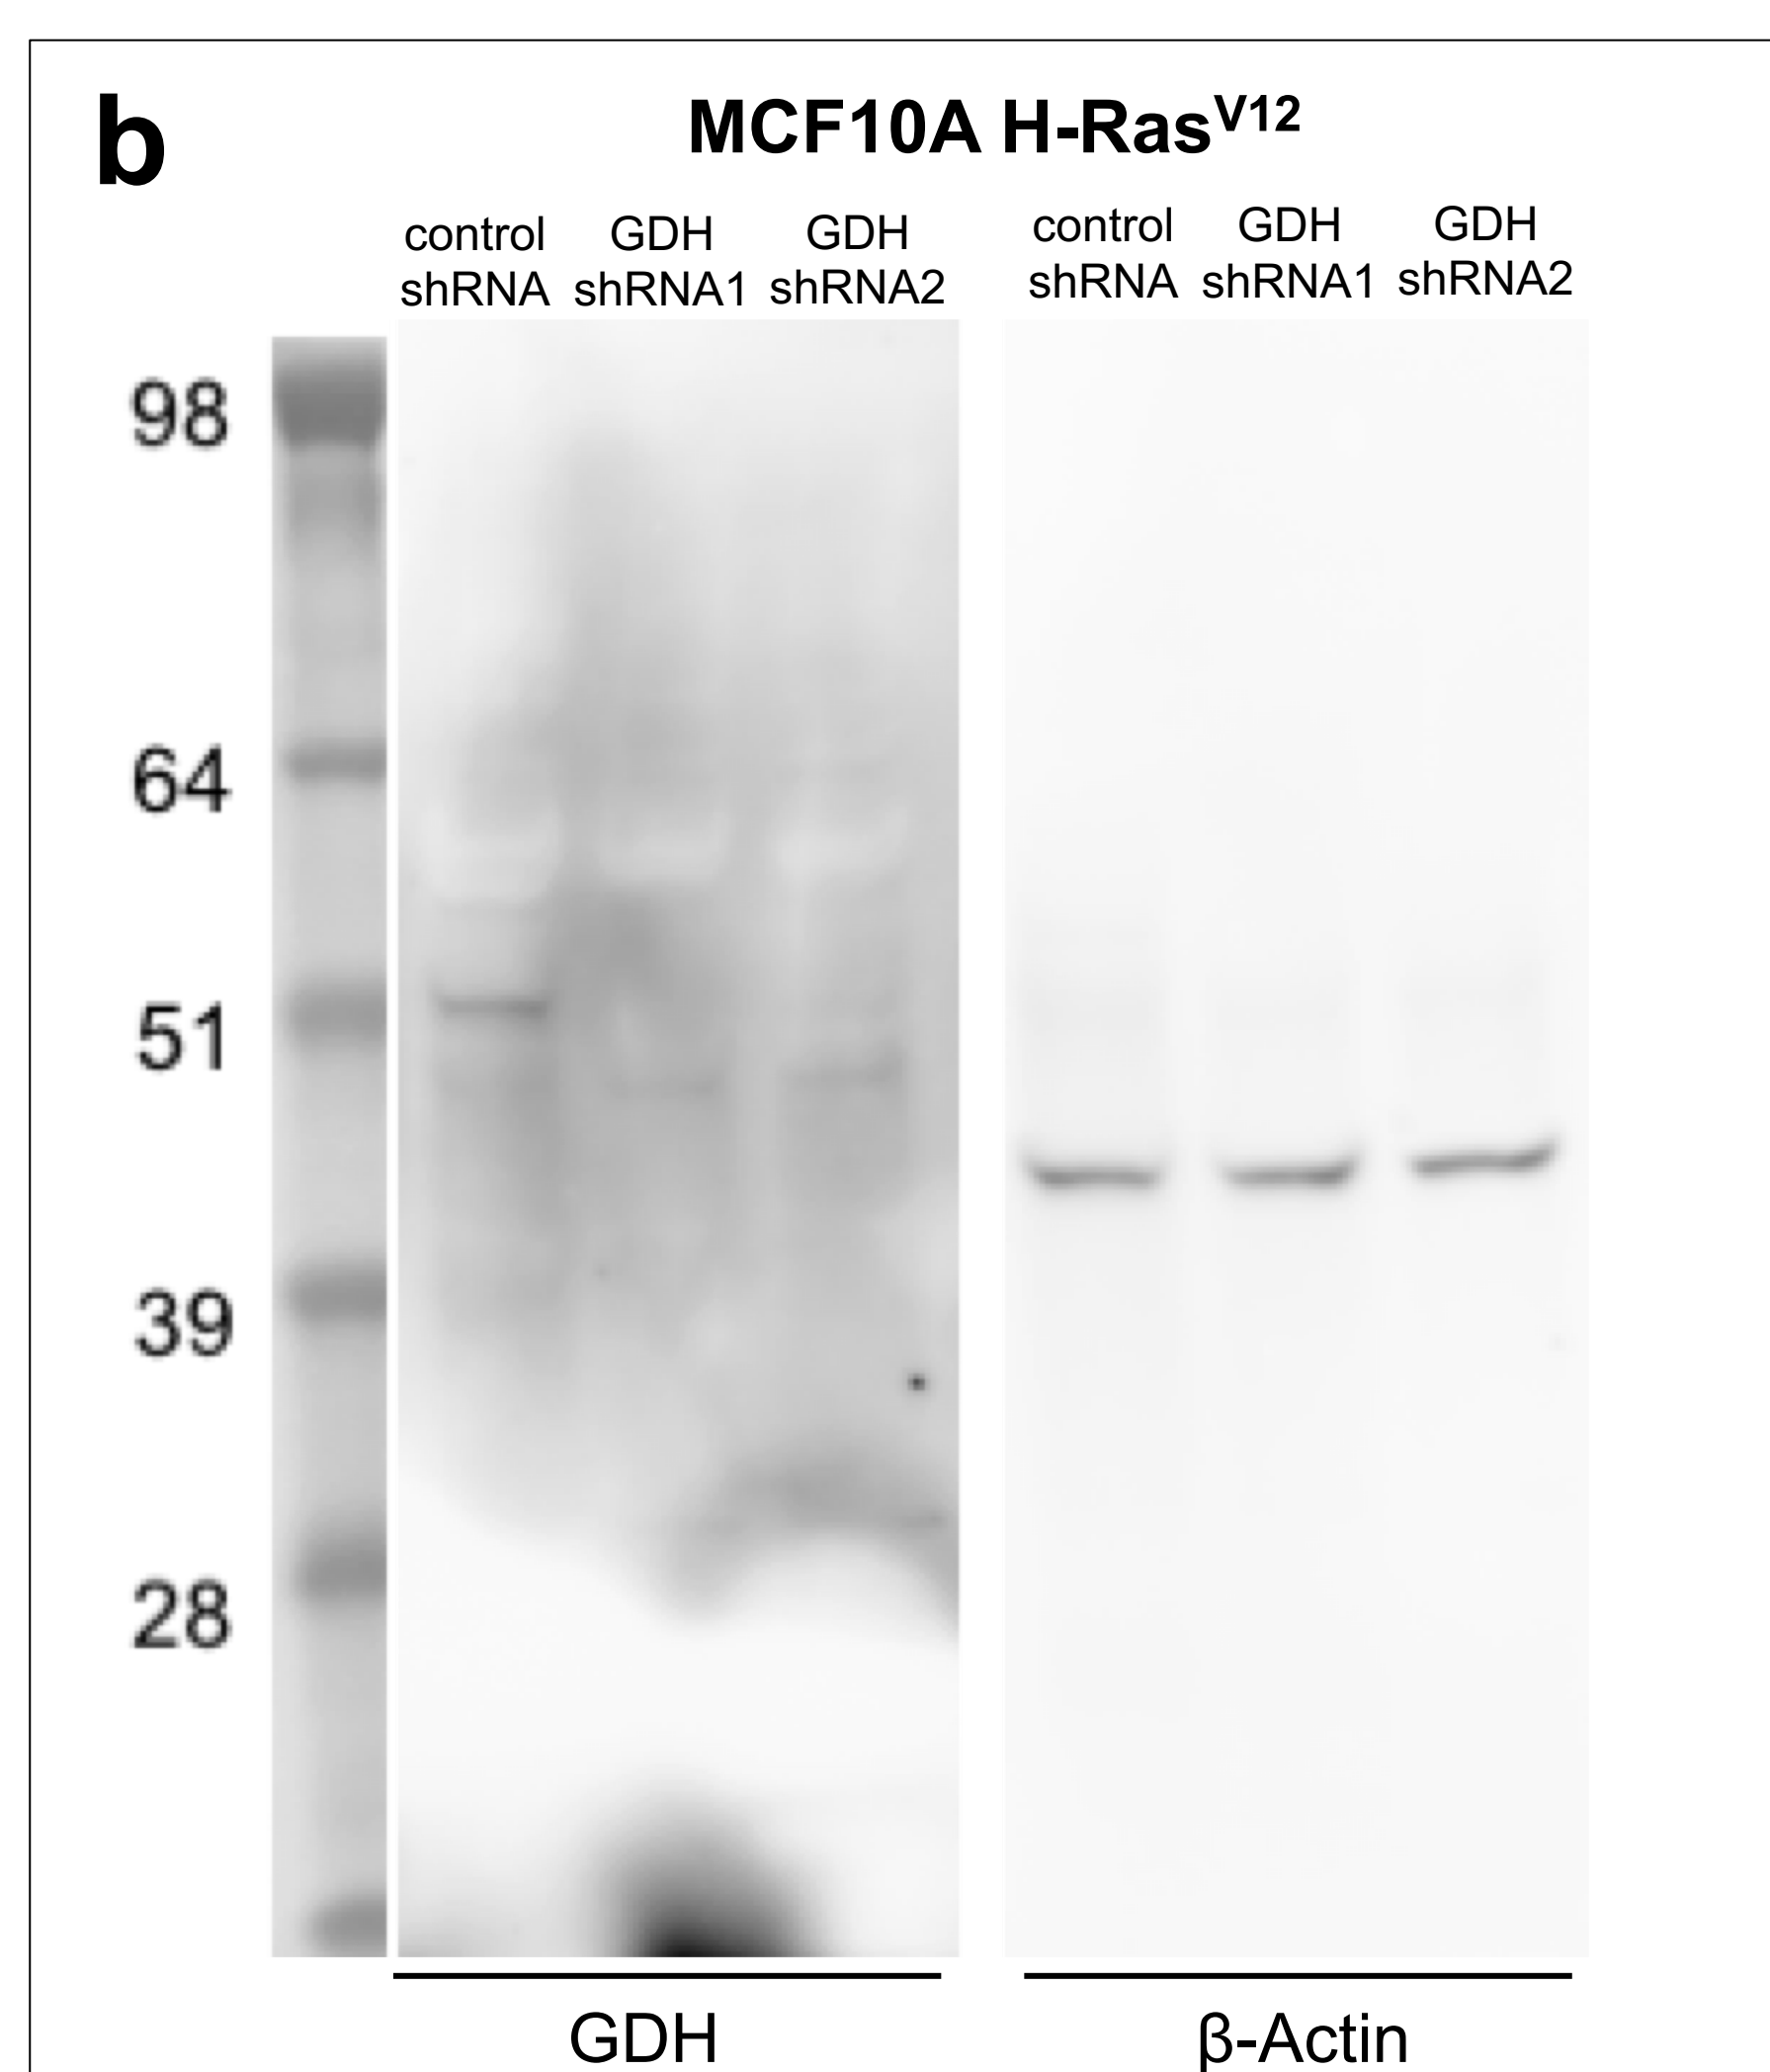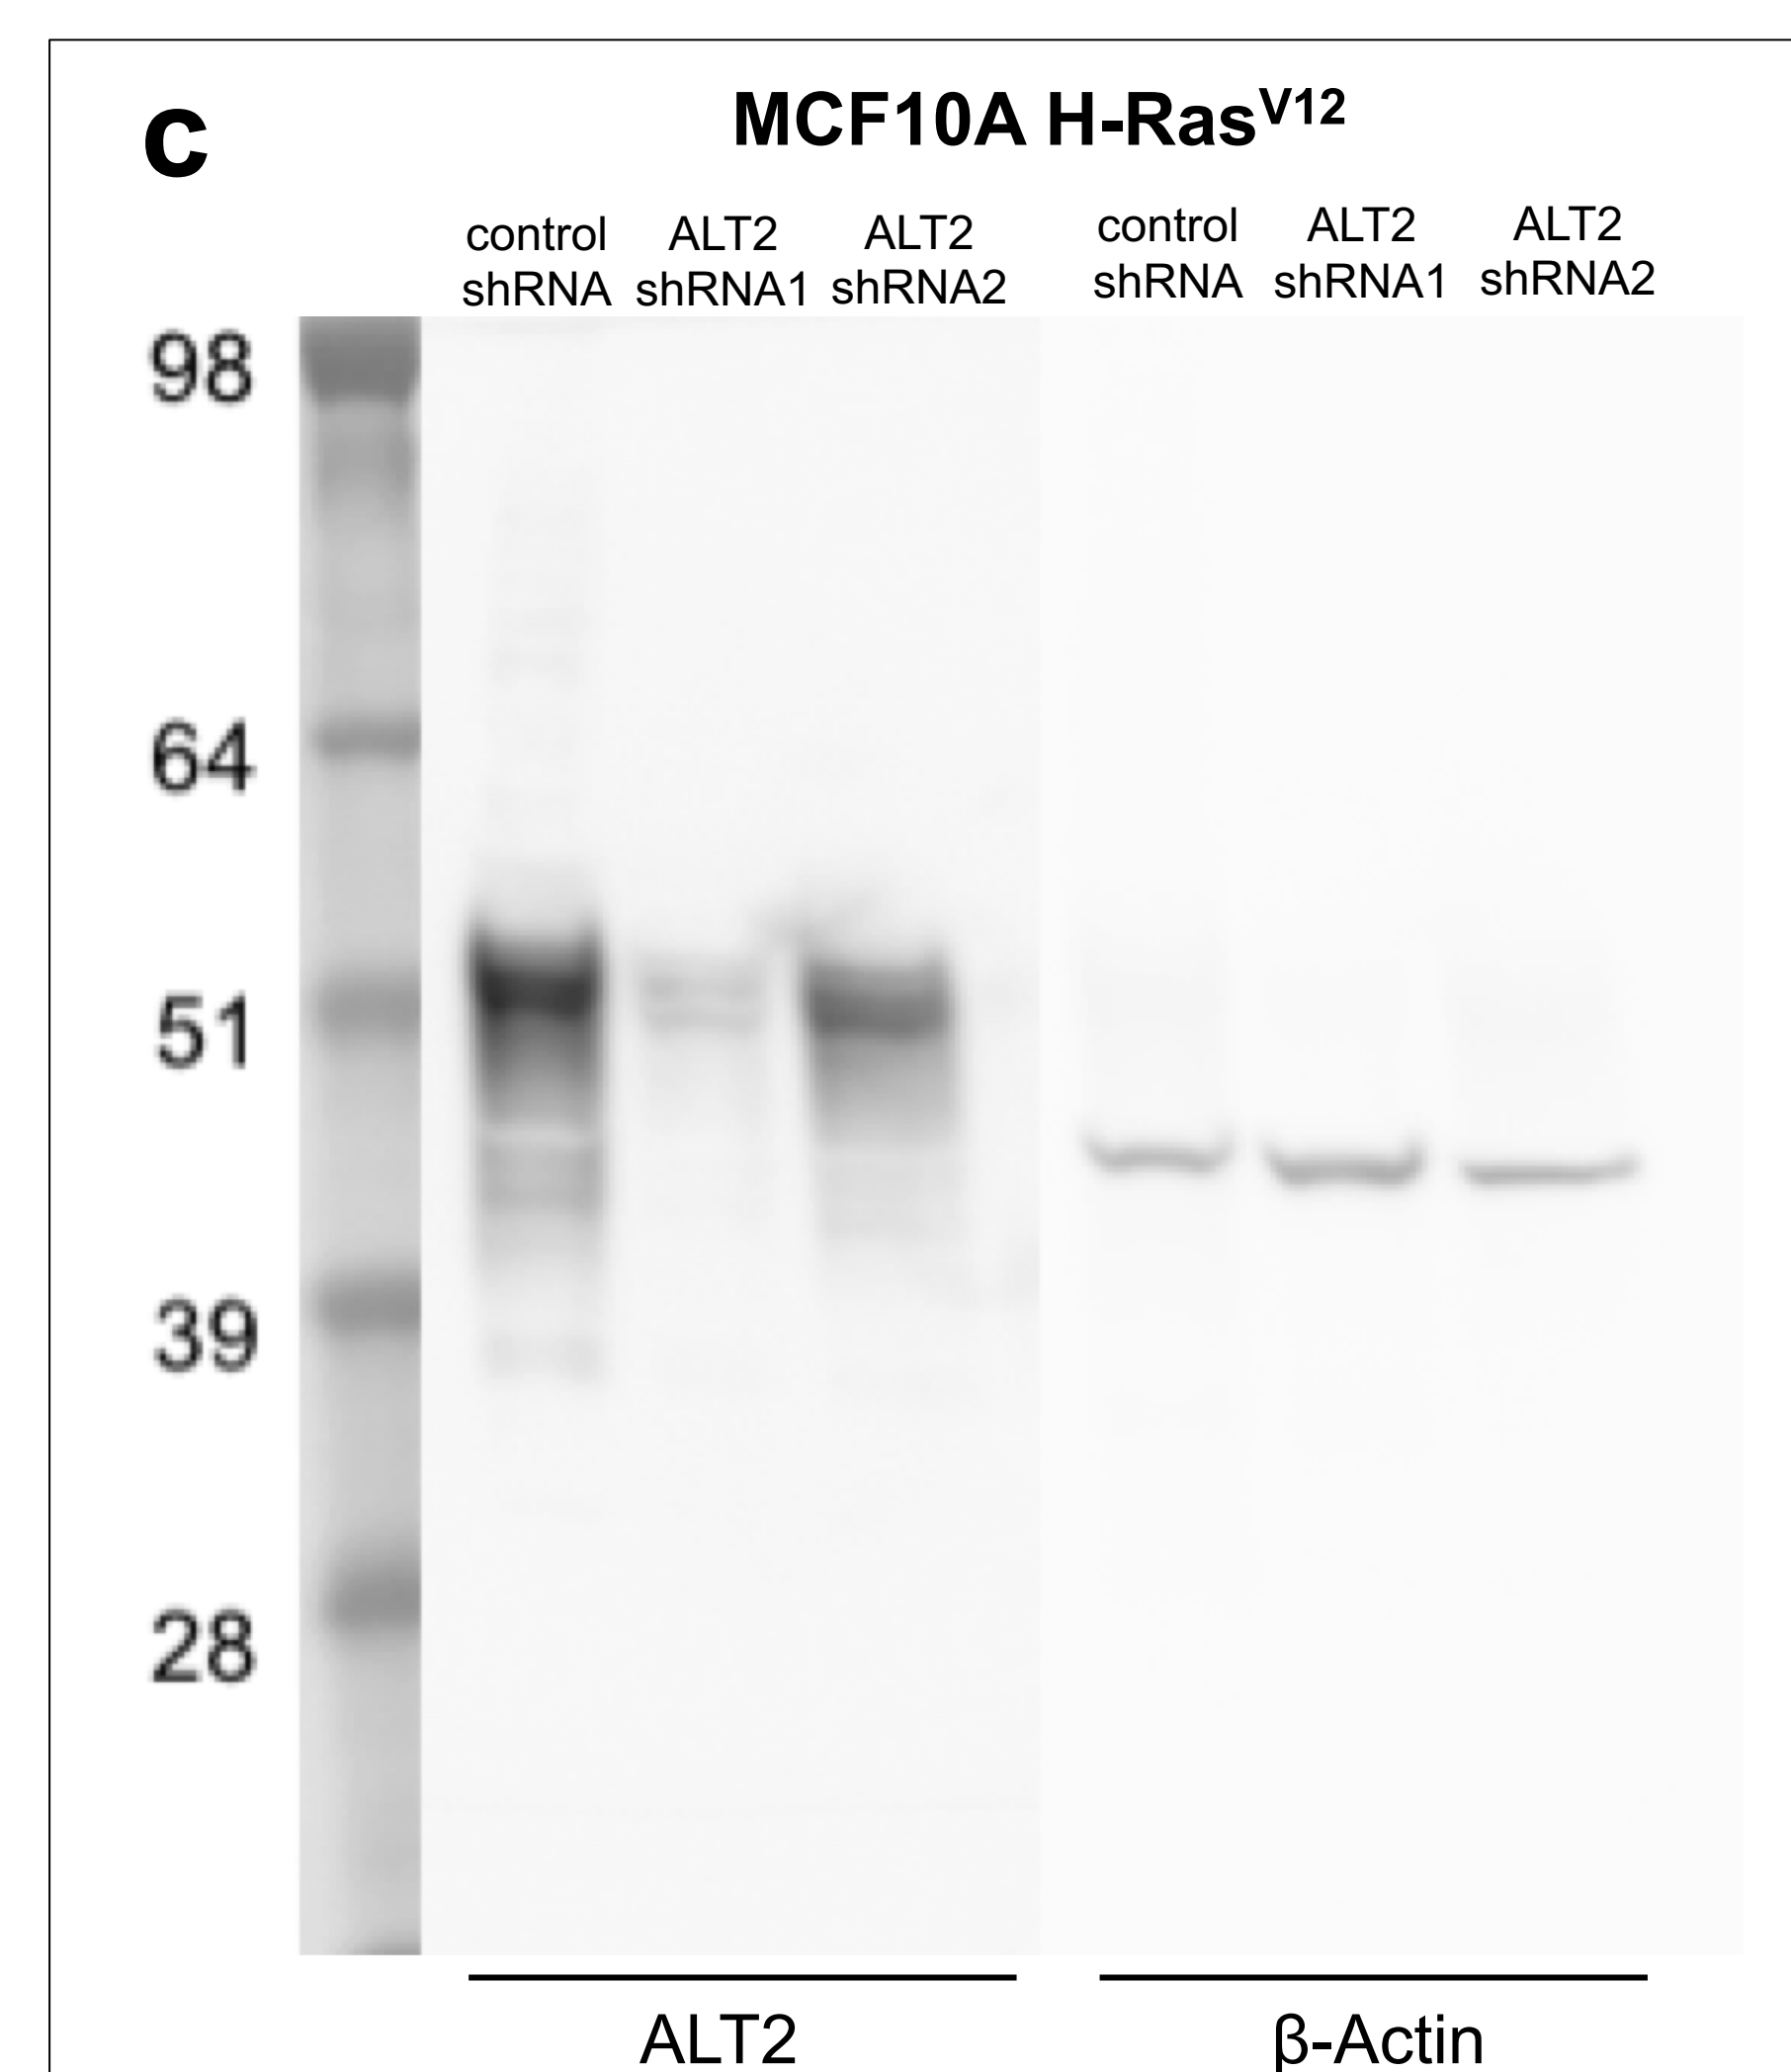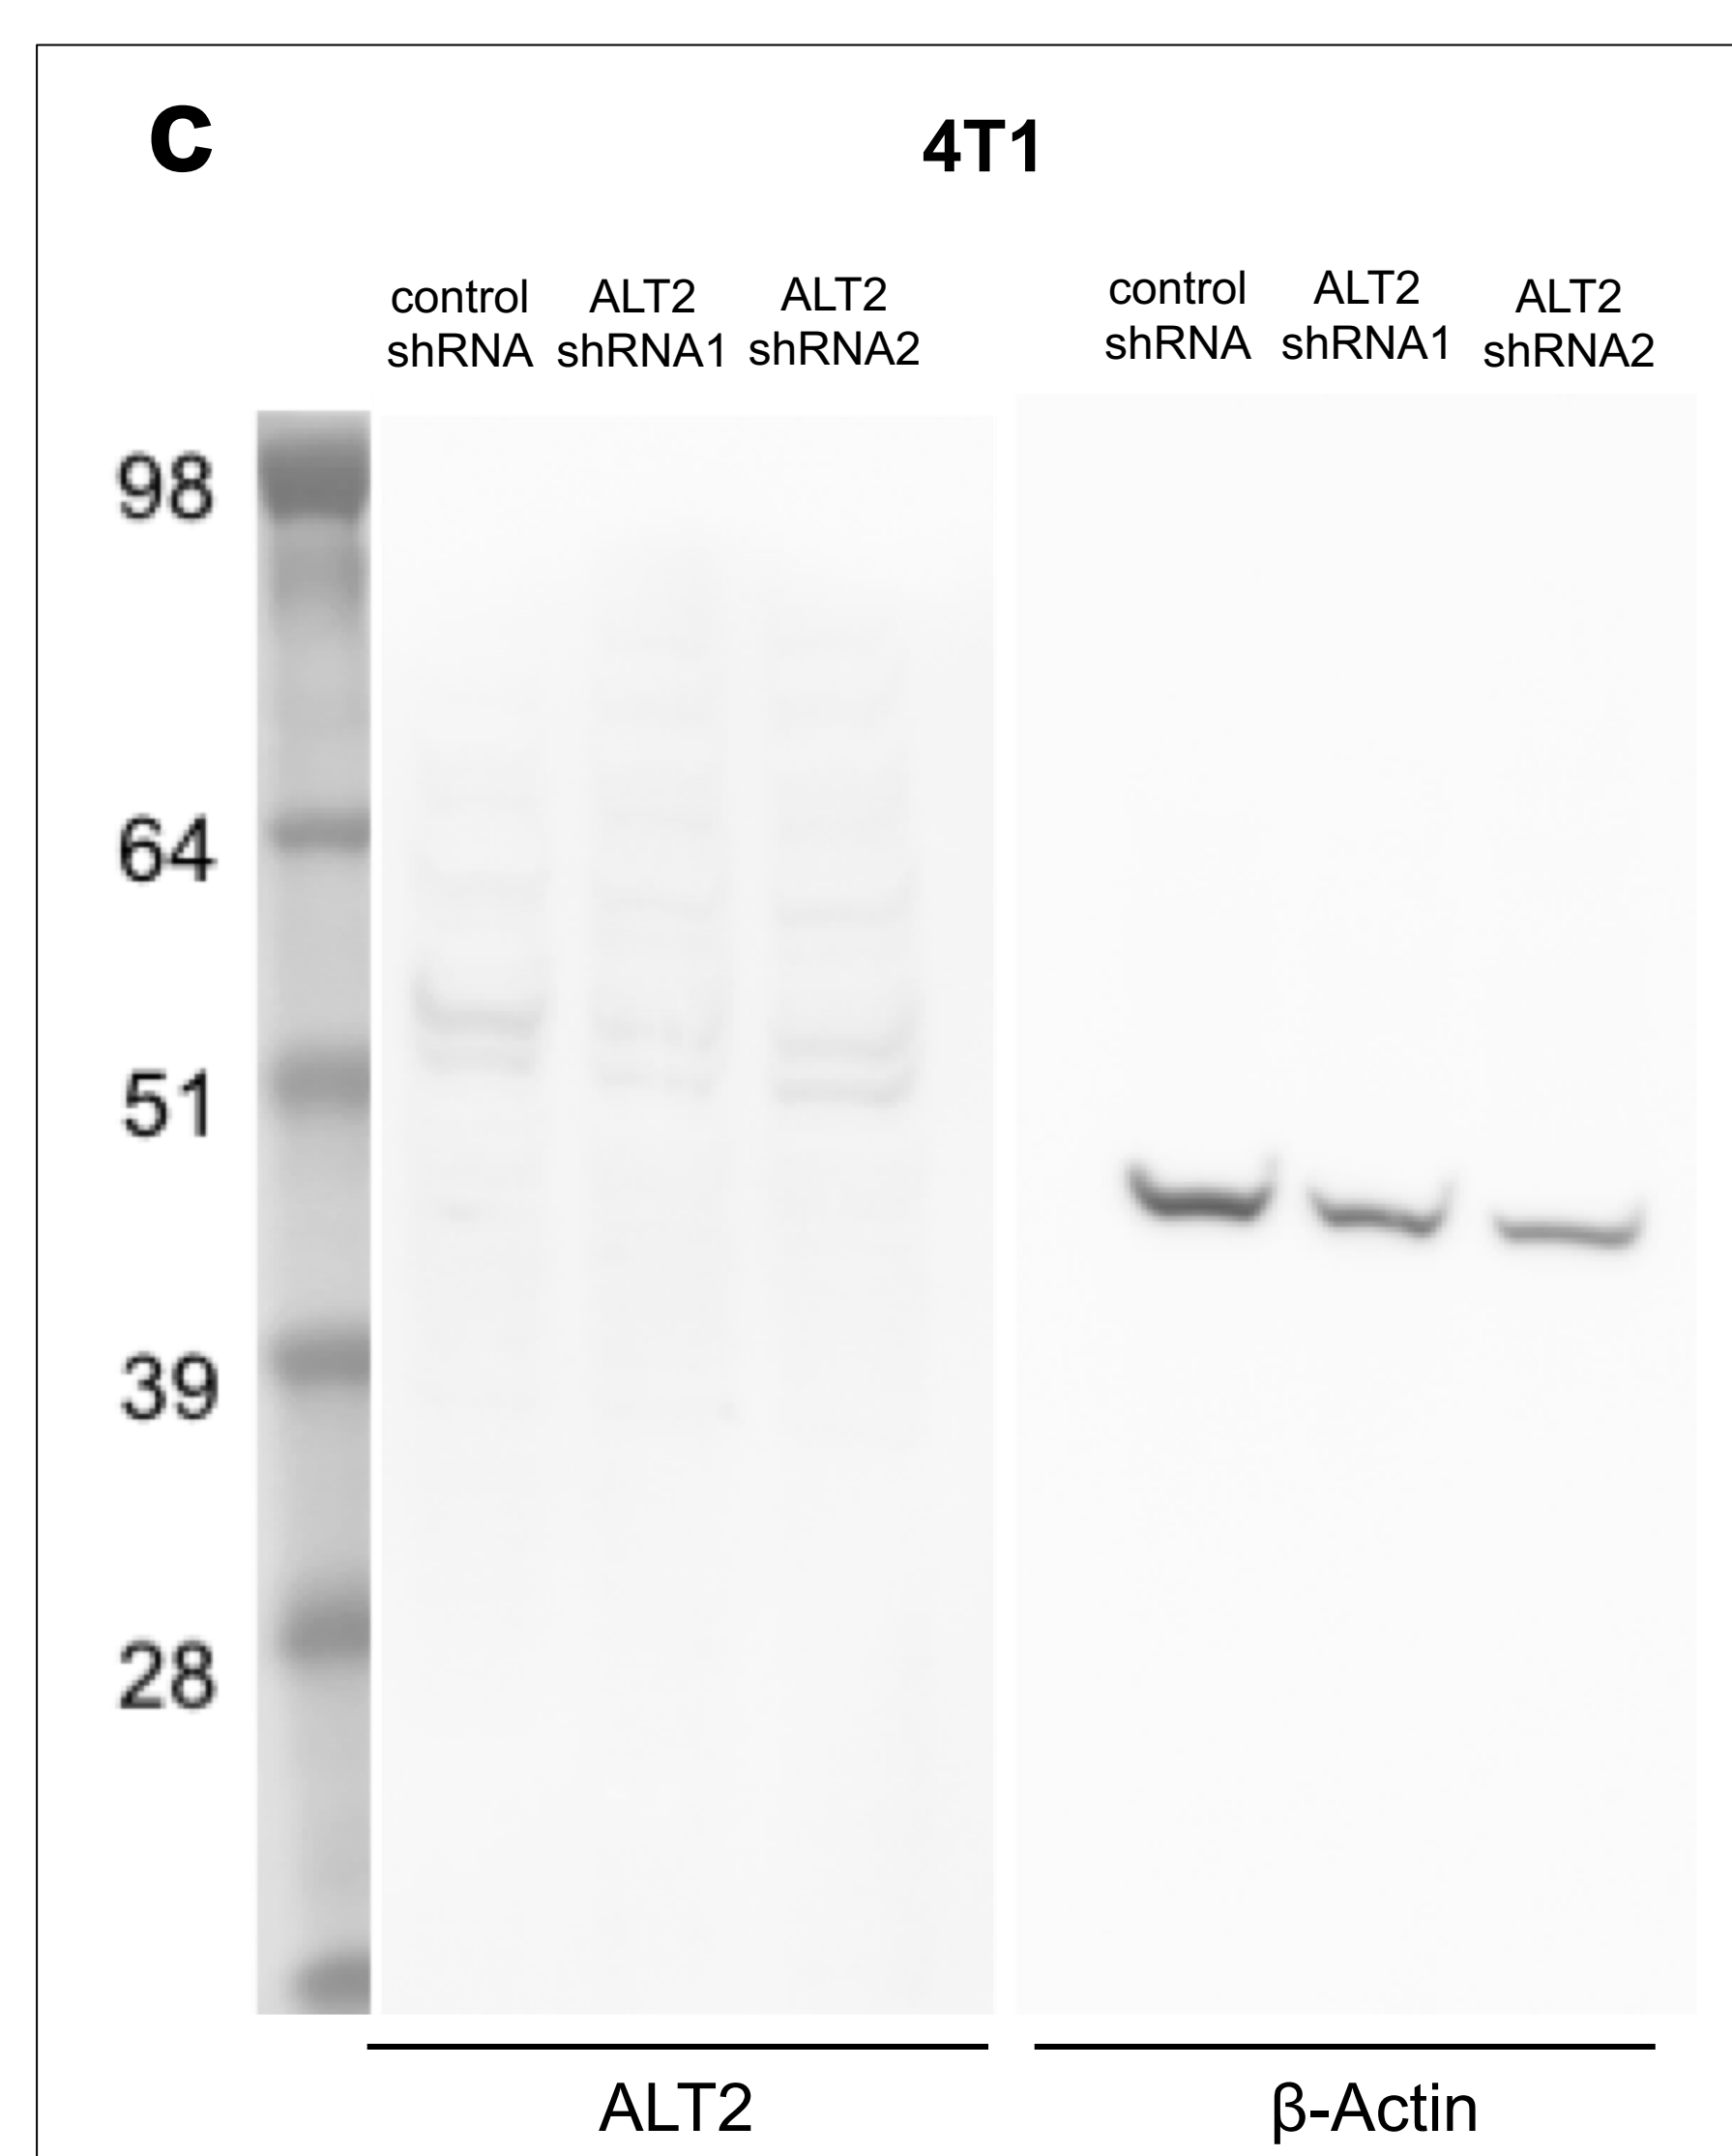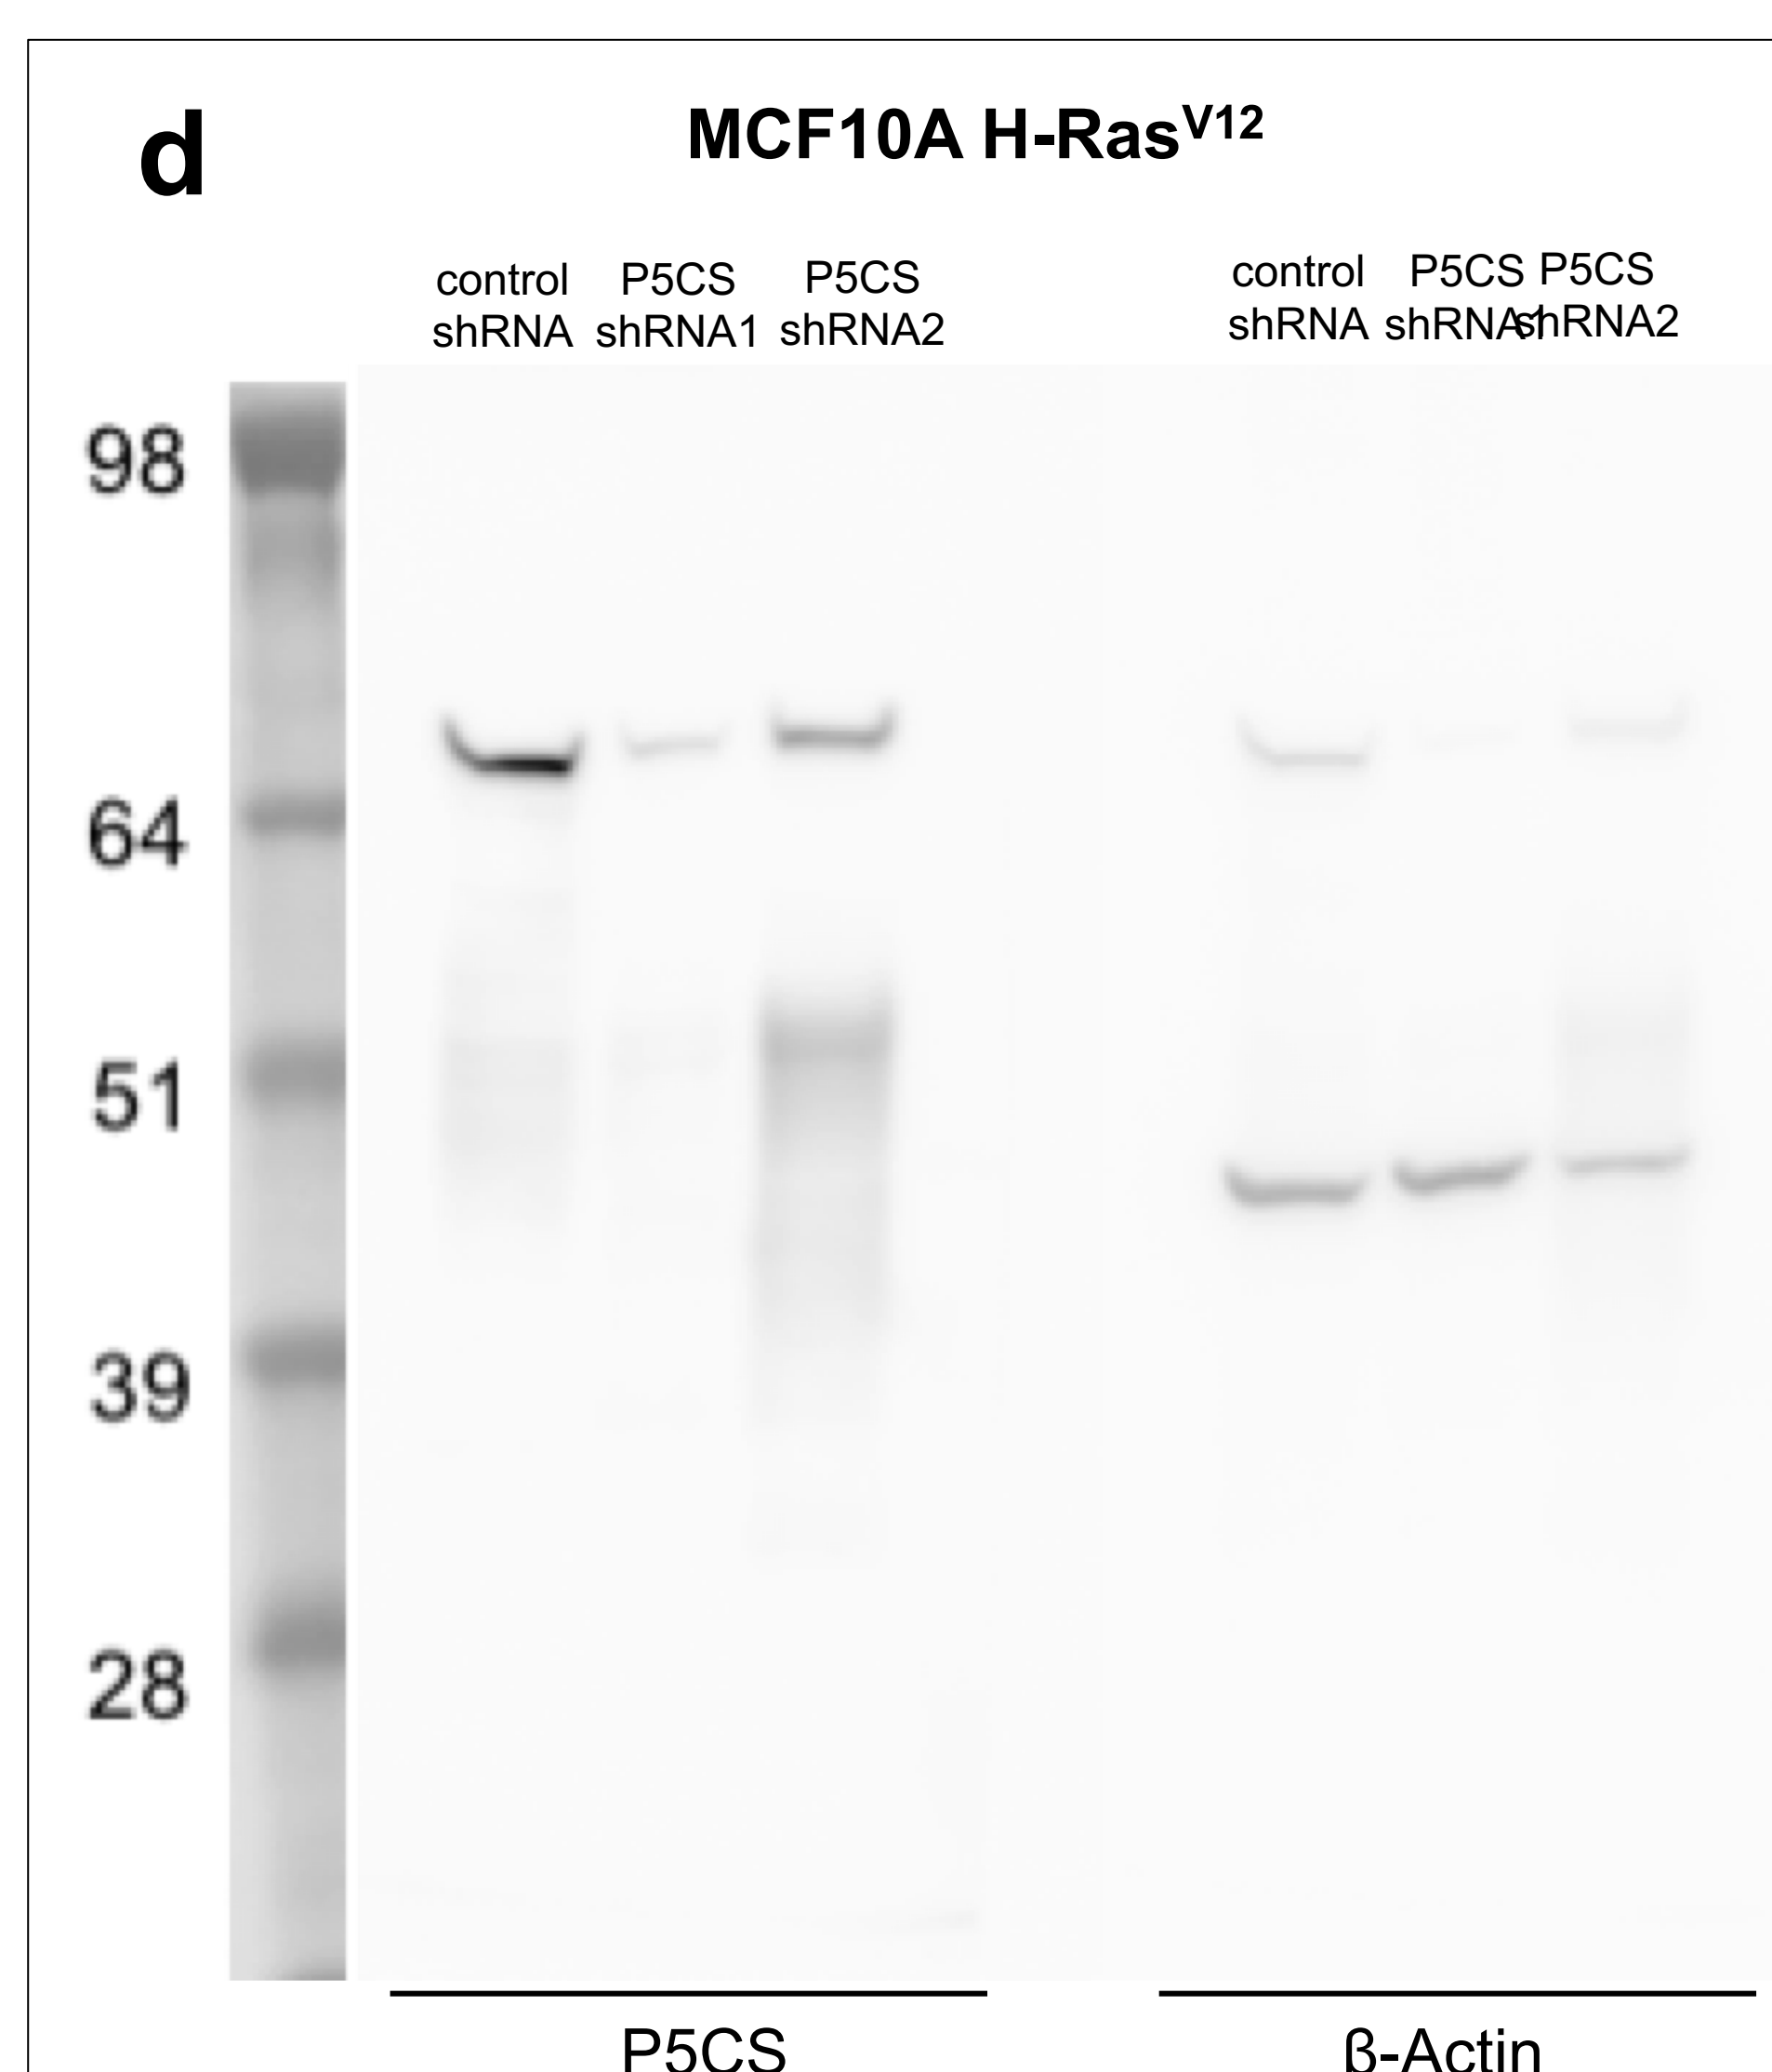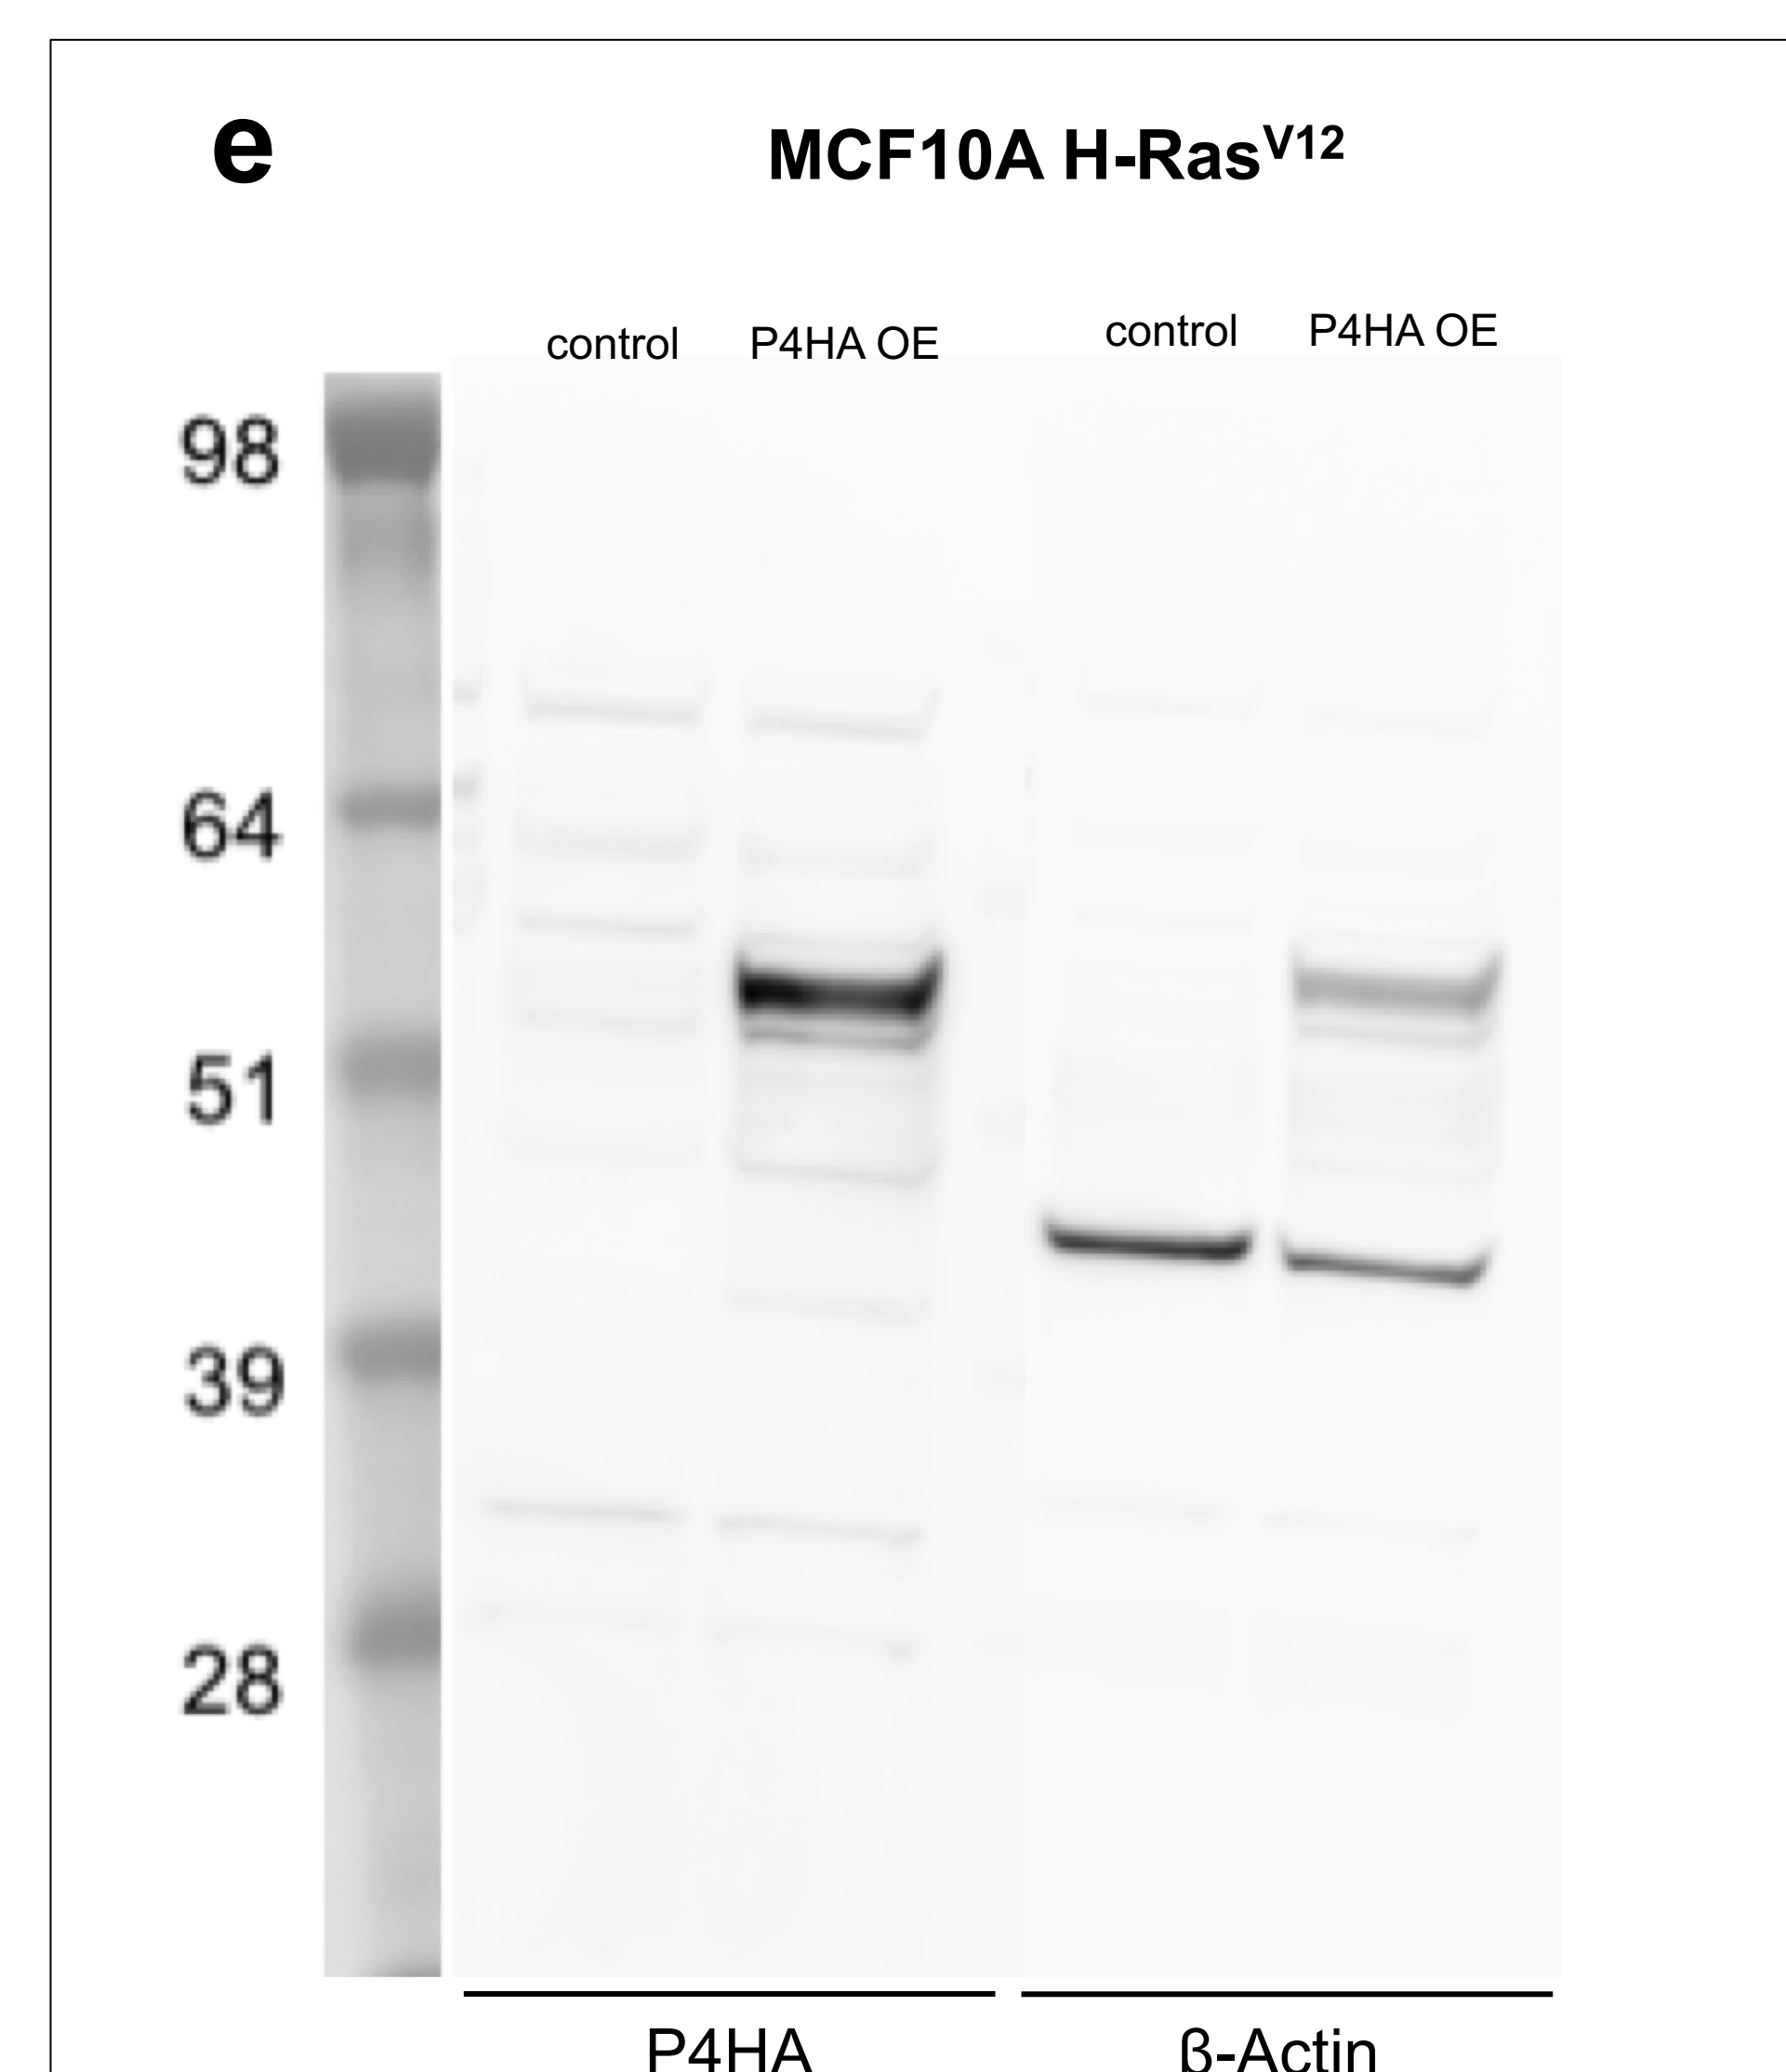

Supplement: NIHMS81520-supplement-Supplementary_figure_1.pdf [file NIHMS81520-supplement-Supplementary_figure_1.pdf]
